# Supplementary material
Source: Elsevier journal article supplement (http://researchonline.lshtm.ac.uk/24800/1/mmc1.pdf)
Supplement: mmc1 [file mmc1.pdf]

LONDON  
SCHOOL of  
HYGIENE  
& TROPICAL  
MEDICINE

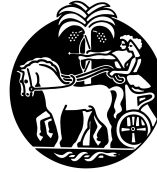

Sarwar, N; Butterworth, AS; Freitag, DF; Gregson, J; Willeit, P; Gorman, DN; Gao, P; Saleheen, D; Rendon, A; Nelson, CP; Braund, PS; Hall, AS; Chasman, DI; Tybjaerg-Hansen, A; Chambers, JC; Benjamin, EJ; Franks, PW; Clarke, R; Wilde, AAM; Trip, MD; Steri, M; Witteman, JCM; Qi, L; van der Schoot, CE; de Faire, U; Erdmann, J; Stringham, HM; Koenig, W; Rader, DJ; Melzer, D; Reich, D; Psaty, BM; Kleber, ME; Panagiotakos, DB; Willeit, J; Wennberg, P; Woodward, M; Adamovic, S; Rimm, EB; Meade, TW; Gillum, RF; Shaffer, JA; Hofman, A; Onat, A; Sundstrom, J; Wassertheil-Smoller, S; Mellstrom, D; Gallacher, J; Cushman, M; Tracy, RP; Kauhanen, J; Karlsson, M; Salonen, JT; Wilhelmsen, L; Amouyel, P; Cantin, B; Best, LG; Ben-Shlomo, Y; Manson, JE; Davey-Smith, G; de Bakker, PIW; O'Donnell, CJ; Wilson, JF; Wilson, AG; Assimes, TL; Jansson, JO; Ohlsson, C; Tivesten, A; Ljunggren, O; Reilly, MP; Hamsten, A; Ingelsson, E; Cambien, F; Hung, J; Thomas, GN; Boehnke, M; Schunkert, H; Asselbergs, FW; Kastelein, JJP; Gudnason, V; Salomaa, V; Harris, TB; Kooner, JS; Allin, KH; Nordestgaard, BG; Hopewell, JC; Goodall, AH; Ridker, PM; Holm, H; Watkins, H; Ouweland, WH; Samani, NJ; Kaptoge, S; di Angelantonio, E; Harari, O; Danesh, J; Emerging, IRGC (2012) Interleukin-6 receptor pathways in coronary heart disease: a collaborative meta-analysis of 82 studies. *Lancet*, 379 (9822). pp. 1205-1213. ISSN 0140-6736 DOI: [https://doi.org/10.1016/S0140-6736\(11\)61931-4](https://doi.org/10.1016/S0140-6736(11)61931-4)

Downloaded from: <http://researchonline.lshtm.ac.uk/24800/>

DOI: [10.1016/S0140-6736\(11\)61931-4](https://doi.org/10.1016/S0140-6736(11)61931-4)

#### Usage Guidelines

Please refer to usage guidelines at <http://researchonline.lshtm.ac.uk/policies.html> or alternatively contact [researchonline@lshtm.ac.uk](mailto:researchonline@lshtm.ac.uk).

Available under license: <http://creativecommons.org/licenses/by-nc-nd/2.5/>

# THE LANCET

## **Supplementary appendix**

This appendix formed part of the original submission and has been peer reviewed. We post it as supplied by the authors.

Supplement to: IL6R Genetics Consortium and Emerging Risk Factors Collaboration. Interleukin-6 receptor pathways in coronary heart disease: a collaborative meta-analysis of 82 studies. *Lancet* 2012; published online March 14. DOI:10.1016/S0140-6736(11)61931-4.

**Interleukin-6 receptor pathways in coronary heart disease:  
collaborative meta-analysis of 82 studies**

**Web Appendix**

Supplementary Methods, 7 Supplementary Tables, 8 Supplementary Figures and a Supplementary Appendix

Correspondence:

Dr Nadeem Sarwar or Dr Adam Butterworth  
Department of Public Health and Primary Care  
University of Cambridge  
Strangeways Research Laboratory  
Cambridge, CB1 8RN  
UK  
Email: [erfc@phpc.cam.ac.uk](mailto:erfc@phpc.cam.ac.uk)  
Tel: +44 1223 741302  
Fax: +44 1223 741339

## Table of contents

|                                                                                                                                                                                                                                                |              |
|------------------------------------------------------------------------------------------------------------------------------------------------------------------------------------------------------------------------------------------------|--------------|
| <b>Supplementary Methods</b>                                                                                                                                                                                                                   | <b>3</b>     |
| <b>Supplementary Tables</b>                                                                                                                                                                                                                    | <b>4-11</b>  |
| Supplementary Table 1: Studies contributing to analyses of <i>IL6R</i> genotypes                                                                                                                                                               | 4            |
| Supplementary Table 2: Study level characteristics of studies contributing to analyses of the <i>IL6R</i> genotypes                                                                                                                            | 6            |
| Supplementary Table 3: Assay methods of studies contributing data to analysis of <i>IL6R</i> genotypes and inflammation biomarkers                                                                                                             | 7            |
| Supplementary Table 4: Observational studies from the Emerging Risk Factors Collaboration contributing to correlation analyses of inflammatory biomarkers                                                                                      | 8            |
| Supplementary Table 5: Association of <i>IL6R</i> genotype with levels of inflammation markers and risk of coronary heart disease, in analyses restricted to studies based in populations of predominantly white European continental ancestry | 9            |
| Supplementary Table 6: <i>IL6R</i> expression in circulating monocytes and macrophages                                                                                                                                                         | 10           |
| Supplementary Table 7: Randomized trials contributing to analyses of tocilizumab (TCZ)                                                                                                                                                         | 11           |
| <b>Supplementary Figures</b>                                                                                                                                                                                                                   | <b>12-19</b> |
| Supplementary Figure 1: Genomic location and linkage disequilibrium among the <i>IL6R</i> variants assessed                                                                                                                                    | 12           |
| Supplementary Figure 2: Association of <i>IL6R</i> genotype with inflammation markers, by study characteristics                                                                                                                                | 13           |
| Supplementary Figure 3: IL-6 production by monocytes following lipopolysaccharide (LPS) stimulation, by <i>IL6R</i> rs4537545 genotype                                                                                                         | 14           |
| Supplementary Figure 4: Association of <i>IL6R</i> genotype with coronary heart disease risk, by study characteristics                                                                                                                         | 15           |
| Supplementary Figure 5: Tocilizumab intervention in randomized trials and circulating lipid concentrations                                                                                                                                     | 16           |
| Supplementary Figure 6: Tocilizumab intervention in randomized trials and circulating concentrations of inflammation markers                                                                                                                   | 17           |
| Supplementary Figure 7: Heterogeneity in randomized trials of tocilizumab and inflammatory biomarkers                                                                                                                                          | 18           |
| Supplementary Figure 8: Heterogeneity in randomized trials of tocilizumab and lipids                                                                                                                                                           | 19           |
| <b>Supplementary Appendix</b>                                                                                                                                                                                                                  | <b>20-27</b> |
| List of acronyms for the genetic studies                                                                                                                                                                                                       | 20           |
| List of acronyms for the observational studies (ERFC)                                                                                                                                                                                          | 21           |
| Search strategy used to identify published reports on tocilizumab                                                                                                                                                                              | 22           |
| Search strategy used to identify reports of <i>IL6R</i> variant associations                                                                                                                                                                   | 25           |
| Investigators in the Cardiogenics Consortium                                                                                                                                                                                                   | 26           |

## Supplementary Methods

### *Associations of IL6R genotypes with IL6R gene expression*

Expression quantitative trait loci (eQTL) analyses were carried out in transcriptomes from 395 healthy blood donors (recruited from one centre) and 363 patients with premature myocardial infarction (recruited from 4 centres) assembled by the Cardiogenics consortium (<http://www.cardiogenics.eu>). All subjects were of white European continental ancestry. RNA was extracted from monocytes and macrophages isolated from whole blood with CD14 micro beads (AutoMacs Pro, Miltenyi). Genomic DNA was extracted from peripheral blood by standard procedures. Gene expression profiling was performed using Illumina Human Ref-8 arrays (Illumina Inc., San Diego, CA). mRNA was amplified and labelled using the Illumina Total Prep RNA Amplification Kit (Ambion, Inc., Austin, TX). After hybridization, array images were scanned using the 7 Illumina BeadArray Reader and probe intensities were extracted using the Gene expression module of the Illumina's Bead Studio software. Variance Stabilization Transformation (VST) was applied to the raw intensities and quantile normalization was performed in the R statistical environment using the Lumi and beadarray packages. Whole-genome genotyping was carried out using either the Human Custom 1.2M or the Human Quad Custom 670 arrays from Illumina. The associations of 2 *IL6R* SNPs (rs4537545 and rs4129267) with transcript levels of *IL6R* were assessed using additive regression models adjusted for age, gender and centre.

Data on associations of *IL6R* genotypes with *IL6R* mRNA levels in 1,490 healthy individuals from the Gutenberg Heart Study were accessed online. Details of the methods used in this study have been described previously.<sup>24</sup> Briefly, the participants were healthy population subjects aged between 35 and 74 living in Mainz, Germany. Following separation of monocytes and purification of cells, genome-wide expression analysis was conducted using the Illumina HT-12 v3 BeadChip and the Affymetrix Human SNP array 6.0. The associations of 2 *IL6R* SNPs (rs4537545 and rs4129267) with *IL6R* transcript levels were assessed using additive regression models adjusted for age and gender.

To test whether the change in IL-6 levels in response to an inflammatory stimulus is affected by carriage of 358Ala, monocytes from 205 healthy blood donors were stimulated with LPS 0ng/ml, LPS 1ng/ml and LPS 5ng/ml. IL-6 concentration was assessed at baseline and 4 hours post-stimulation. The relationship between IL-6 production and *IL6R* rs4537545 genotype was calculated relative to LPS 0ng/ml using linear regression.

Data on associations with *IL6R* genotypes with *IL6R* mRNA levels were also looked up in liver cells from 427 European individuals,<sup>27</sup> lymphoblastoid cell lines from multiple European adult populations,<sup>28</sup> T-cell or lymphoblastoid cell lines from umbilical cords of 75 individuals,<sup>26</sup> or lymphoblastoid cell lines from 166 healthy female twins.<sup>25</sup>

**Supplementary Table 1: Studies contributing to analyses of *IL6R* genotypes**

| Study           | Genotyping |              |             | Conventional risk factors                      |              |              |              |              |               |              |               | Inflammation biomarkers                        |             |              |              | Coronary disease |                 |               |
|-----------------|------------|--------------|-------------|------------------------------------------------|--------------|--------------|--------------|--------------|---------------|--------------|---------------|------------------------------------------------|-------------|--------------|--------------|------------------|-----------------|---------------|
|                 | Acronym*   | SNP assessed | MAF         | No. of participants with available information |              |              |              |              |               |              |               | No. of participants with available information |             |              |              | No. of cases     | No. of controls |               |
|                 | rs4537545  | rs4129267    | rs2228145   | LDL-C                                          | HDL-C        | TG           | FBG          | SBP          | BMI           | WC           | Smoking       | Diabetes                                       | s-IL-6R     | IL-6         | CRP          | Fib              |                 |               |
| ADVANCE         | ✓          |              |             | 282                                            | 288          | 288          | 282          | 311          | 310           | 308          | 312           | 312                                            |             |              | 301          |                  | 278             | 312           |
| AGES            | ✓          |              |             | 3214                                           | 3216         | 3216         | 3216         | 3215         | 3213          | 3211         | 3216          | 3212                                           |             |              | 3215         |                  | 775             | 2574          |
| BHF-FHS         | ✓          |              |             |                                                |              |              |              |              |               |              |               |                                                |             |              |              |                  | 2101            | 2426          |
| BLOODOMICS-1    | ✓          |              |             |                                                |              |              |              |              |               |              |               |                                                |             |              |              |                  | 1462            | 1222          |
| BLOODOMICS-2    | ✓          |              |             |                                                |              |              |              |              |               |              |               |                                                |             |              |              |                  | 1910            | 1932          |
| CIHD            | ✓          |              |             |                                                |              |              |              |              |               |              |               |                                                |             |              |              |                  | 5111            | 6626          |
| COPEN           | ✓          |              |             | 8851                                           | 9114         | 9100         |              | 9122         | 9098          | 9075         | 9080          | 9083                                           |             |              | 8281         | 8867             | 1968            | 7162          |
| COROGENE        | ✓          |              |             |                                                |              |              |              |              |               |              | 1856          | 1870                                           |             |              |              |                  |                 |               |
| CUDAS/CUPID     | ✓          |              |             | 1001                                           | 1001         | 1001         | 995          | 1001         | 1001          | 1001         | 1001          | 1001                                           |             | 933          | 968          | 984              | 548             | 1001          |
| DECODE          | ✓          |              |             | 1685                                           | 11998        | 11952        | 6719         | 10852        | 27877         | 6123         | 21382         |                                                |             |              | 6215         |                  | 7370            | 27059         |
| DILGOM          | ✓          | ✓            |             | 3975                                           | 3975         | 3975         | 3986         | 3980         | 3996          | 3975         | 3976          | 3996                                           |             | 3941         | 3975         |                  | 128             | 3868          |
| EPIC-NL         | ✓          |              |             | 2427                                           | 2427         | 2427         |              | 2427         | 2427          | 2427         | 1638          | 2009                                           |             |              | 2427         |                  | 1221            | 1833          |
| FHS-G3          | ✓          |              |             |                                                | 3531         | 3532         | 3532         | 3532         | 3528          | 3517         | 3531          | 3526                                           |             | 3494         | 3515         |                  |                 |               |
| FHS-offspring   | ✓          |              |             | 2648                                           | 2678         | 2683         | 2622         | 2792         | 2685          | 2662         | 2793          | 2692                                           |             | 2667         | 2672         | 2671             |                 |               |
| Framingham      | ✓          |              |             |                                                |              |              |              |              |               |              |               |                                                |             |              |              |                  | 489             | 7338          |
| FUSION_1        | ✓          |              |             | 1560                                           | 1587         | 1587         | 1594         | 1619         | 1620          | 1613         | 578           | 1651                                           |             |              |              |                  | 309             | 2022          |
| FUSION_2        | ✓          |              | ✓           |                                                |              |              |              |              |               |              |               |                                                |             |              |              |                  | 165             | 2633          |
| GerMIFS_1       | ✓          |              |             |                                                |              |              |              |              | 1531          |              |               |                                                |             |              |              |                  | 970             | 1604          |
| GerMIFS_2       | ✓          |              |             | 489                                            | 499          | 499          |              | 499          | 485           |              |               |                                                |             |              |              |                  | 1222            | 1284          |
| GLACIER         | ✓          | ✓            |             | 3144                                           | 3168         | 3492         | 5970         | 5930         | 5991          | 108          | 5951          | 5951                                           |             |              |              |                  |                 |               |
| Guangzhou†      | ✓          |              | ✓           | 1904                                           | 1905         | 1905         | 1905         | 1899         | 1905          | 1905         |               |                                                |             |              | 1235         | 1871             |                 |               |
| HealthABC‡      | ✓          |              | ✓           |                                                |              |              |              |              | 1168          |              |               |                                                | 577         | 1116         | 1172         |                  |                 |               |
| HPS             | ✓          |              |             |                                                |              |              |              |              |               |              |               |                                                |             |              |              |                  | 2703            | 2884          |
| HUNT            | ✓          | ✓            |             | 1222                                           | 1318         | 1319         |              | 1308         | 1284          | 1290         | 1325          | 1325                                           |             |              |              |                  | 159             | 1299          |
| HVHS            | ✓          |              |             | 744                                            | 1046         | 813          |              | 1070         | 1069          |              | 1070          | 1070                                           |             |              |              |                  | 221             | 849           |
| INCHIANTI       | ✓          |              |             | 1064                                           | 1064         | 1064         | 1064         | 1054         | 1012          | 1011         | 1093          | 967                                            | 1068        | 1067         | 1058         | 1058             | 106             | 1163          |
| InterHeart-1†‡§ | ✓          |              |             |                                                |              |              |              |              |               |              |               |                                                |             |              |              |                  | 1137            | 1215          |
| InterHeart-2†§  | ✓          |              |             |                                                |              |              |              |              |               |              |               |                                                |             |              |              |                  | 796             | 895           |
| ISIS†§          | ✓          |              |             |                                                |              |              |              |              |               |              |               |                                                |             |              |              |                  | 2073            | 1493          |
| LOLIPOP‡        | ✓          |              | 0.31        | 5430                                           | 5589         | 5589         | 5589         | 5590         | 5586          | 5589         | 5590          | 5589                                           |             |              | 4797         |                  | 2979            | 3556          |
| LURIC           | ✓          |              | 0.40        | 647                                            | 647          | 647          | 647          | 647          | 647           | 641          |               |                                                |             | 645          | 647          | 646              | 2493            | 693           |
| METSIM          | ✓          | ✓            | 0.27        | 1727                                           | 1728         | 1728         | 1729         | 1729         | 1728          | 1728         | 1729          | 1729                                           |             |              | 1679         |                  | 117             | 1823          |
| MOGERAUG        | ✓          |              | 0.40        | 1210                                           | 1662         | 478          | 478          | 1662         | 1655          | 1208         | 1662          | 1662                                           |             | 1662         | 1660         | 1206             | 272             | 1390          |
| MrOS            | ✓          |              | 0.40        |                                                |              |              |              | 2004         | 2030          |              | 2030          | 2029                                           |             |              | 1980         |                  | 587             | 2195          |
| NHS             | ✓          |              | 0.40        |                                                |              |              |              |              | 3192          | 2213         | 2035          | 3219                                           |             | 972          | 988          |                  | 301             | 976           |
| ORCADES         | ✓          | ✓            | 0.36        | 766                                            | 766          | 766          | 766          | 760          | 760           | 760          | 766           | 766                                            |             |              | 761          | 761              | 107             | 766           |
| PennCATH        | ✓          |              | 0.42        |                                                |              |              |              |              |               |              |               |                                                |             |              |              |                  | 1027            | 489           |
| PIVUS           | ✓          | ✓            | 0.38        | 881                                            | 883          | 883          | 883          | 882          | 886           | 877          | 885           | 886                                            |             | 871          | 880          |                  | 94              | 885           |
| PROCARDIS       | ✓          |              | 0.42        | 2957                                           | 2957         | 2957         |              | 2904         | 2908          |              | 2955          | 2969                                           |             |              | 2954         | 2954             | 2121            | 2969          |
| PROMIS‡         | ✓          |              | 0.30        |                                                |              |              |              |              |               |              |               |                                                |             |              |              |                  | 4741            | 4575          |
| ROTT            | ✓          |              | 0.40        |                                                | 378          |              |              | 377          | 377           | 329          |               |                                                |             | 379          | 362          | 257              | 1317            | 3730          |
| SARDINIA        | ✓          | ✓            | 0.26        | 5424                                           | 5424         | 5424         | 5424         | 5418         | 5425          | 5425         | 5705          | 5432                                           |             | 5325         | 5138         | 5420             | 44              | 5705          |
| SCARF           | ✓          | ✓            | 0.37        | 383                                            | 383          | 385          | 381          | 380          | 385           | 383          | 383           | 383                                            |             | 374          | 378          | 380              | 336             | 386           |
| SHEEP           | ✓          |              | 0.40        | 2563                                           | 2590         | 2613         | 2356         | 2601         | 2595          | 2601         | 2558          | 2614                                           |             | 1615         | 1935         | 2442             | 1135            | 1481          |
| ULSAM           | ✓          | ✓            | 0.39        | 967                                            | 970          | 972          | 971          | 971          | 968           | 954          | 972           | 971                                            |             | 889          | 941          | 445              | 233             | 942           |
| WGHS            | ✓          |              | 0.41        | 23178                                          | 23178        | 23178        |              | 23041        | 22880         | 20558        | 23268         | 23286                                          |             |              | 23178        | 22262            | 315             | 22971         |
| <b>Total</b>    |            |              | <b>0.39</b> | <b>80343</b>                                   | <b>95970</b> | <b>94473</b> | <b>51109</b> | <b>99577</b> | <b>122222</b> | <b>81492</b> | <b>109340</b> | <b>89817</b>                                   | <b>1645</b> | <b>27185</b> | <b>83948</b> | <b>50353</b>     | <b>51441</b>    | <b>136226</b> |

**MAF, minor allele frequency; LDL-C, low-density lipoprotein cholesterol; HDL-C high-density lipoprotein cholesterol; TG, triglyceride; FBG, fasting blood glucose; SBP, systolic blood pressure; BMI, body mass index; WC waist circumference; s-IL-6R, soluble interleukin-6 receptor; IL-6, interleukin-6; CRP, C-reactive protein; Fib, fibrinogen.**

\* Study acronyms are listed in the Supplementary Appendix; † For these studies, data were extracted from publications; ‡ These studies were based in populations not of predominantly white European descent; § Calculated in people without cardiovascular disease.

**Data on conventional risk factors or inflammation biomarkers were from people with no known history of cardiovascular disease.**

**Supplementary Table 2: Study level characteristics of studies contributing to analyses of the *IL6R* genotypes**

| Study         |                     |             |                                           | Genotyping                         | Coronary disease          |                |                                     |
|---------------|---------------------|-------------|-------------------------------------------|------------------------------------|---------------------------|----------------|-------------------------------------|
| Acronym*      | Design              | Location    | Population source                         | Platform used                      | Coronary disease assessed | MI definition† | CAD definition                      |
| ADVANCE       | Case-control        | USA         | Healthcare register                       | Illumina 550K array                | MI & CAD                  | ●●             | >50% stenosis or Revascularisation§ |
| AGES          | Cohort              | Iceland     | Population register                       | Illumina 370CNV BeadChip array     | MI & CAD                  | ●●●            | Revascularisation§                  |
| BHF-FHS       | Case-control        | England     | Population register                       | Affymetrix 500K array              | CAD                       |                | >50% stenosis or Revascularisation§ |
| BLOODOMICS-1  | Case-control        | Netherlands | Hospital admissions/blood donors          | Illumina IBC 50K array             | MI                        | ●●●            |                                     |
| BLOODOMICS-2  | Case-control        | Germany     | Hospital admissions/general population    | Illumina IBC 50K array             | CAD                       |                | >50% stenosis or Revascularisation§ |
| CIHDS         | Case-control        | Denmark     | Hospital admissions/general population    | TaqMan                             | MI & CAD                  | ●●             | Stenosis‡                           |
| COPEN         | Cohort              | Denmark     | Population register                       | TaqMan                             | MI & CAD                  | ●●             |                                     |
| COROGENE      |                     | Finland     | Hospital admissions                       |                                    |                           |                |                                     |
| CUDAS/CUPID   | Case-control        | Australia   | Electoral rolls/Hospital admissions       | TaqMan                             | MI & CAD                  | ●              | >50% stenosis                       |
| DECODE        | Cohort              | Iceland     | Population register                       | Illumina 370CNV BeadChip array     | MI & CAD                  | ●●●            | Revascularisation§                  |
| DILGOM        | Cohort              | Finland     | Population register                       | Illumina 610-Quad array            | MI & CAD                  | ●●●            | Revascularisation§                  |
| EPIC-NL       | Nested case-control | Netherlands | Population register                       | Illumina IBC 50K array             | MI                        | ●              |                                     |
| FHS-G3        | Cohort              | USA         | Household listings                        | Affymetrix 500K array              |                           |                |                                     |
| FHS-offspring | Cohort              | USA         | Household listings                        | Multiplex                          |                           |                |                                     |
| Framingham    | Cohort              | USA         | Population register                       | Multiplex                          | MI                        | ●●●            |                                     |
| FUSION_1      | Cohort              | Finland     | Hospital admissions/general population    | Illumina HumanHap300 BeadChip      | MI                        | ●              |                                     |
| FUSION_2      | Cohort              | Finland     | Hospital admissions/general population    | Illumina Cardio-MetaboChip         |                           |                |                                     |
| GerMIFS_1     | Case-control        | Germany     | Cardiac rehabilitation/general population | Affymetrix 500K array              | MI                        | ●●●            |                                     |
| GerMIFS_2     | Case-control        | Germany     | Cardiac rehabilitation/general population | Affymetrix 500K array              | MI                        | ●●●            |                                     |
| GLACIER       | Cohort              | Sweden      | Population register                       | OpenArray SNP Genotyping System    |                           |                |                                     |
| Guangzhou     | Cohort              | China       | Population register                       | TaqMan                             |                           |                |                                     |
| HealthABC     | Cohort              | USA         | Population register                       | Sequenom Mass array                |                           |                |                                     |
| HPS           | Clinical trial      | UK          | Hospital admissions/general population    | Illumina 610-Quad array            | MI & CAD                  | ●              |                                     |
| HUNT          | Cohort              | Norway      | Population register                       | Illumina Cardio-MetaboChip         | MI                        | ●              |                                     |
| HVHS          | Case-control        | USA         | GP lists                                  | Illumina GoldenGate                | MI                        | ●●●            |                                     |
| INCHIANTI     | Cohort              | Italy       | Population register                       | TaqMan                             | MI                        | ●              |                                     |
| InterHeart-1  | Case-control        | India       | Hospital admissions/general population    | Illumina GoldenGate                | MI                        | ●●●            |                                     |
| InterHeart-2  | Case-control        | Europe      | Hospital admissions/general population    | Illumina GoldenGate                | MI                        | ●●●            |                                     |
| ISIS          | Case-control        | UK          | Hospital admissions/general population    | TaqMan                             | MI                        | ●●             |                                     |
| LOLIPOP       | Case-control        | UK          | General population                        | Illumina IBC 50K array             | MI & CAD                  | ●●●            |                                     |
| LURIC         | Cross-sectional     | Germany     | Elective angiography patients             | Illumina IBC 50K array             | MI & CAD                  | ●●●            | >50% stenosis                       |
| METSIM        | Cohort              | Finland     | Population register                       | Illumina Cardio-MetaboChip         | MI                        | ●              |                                     |
| MOGERAUG      | Case-cohort         | Germany     | Population register                       | Illumina IBC 50K array             | MI                        | ●●●            |                                     |
| MrOS          | Cohort              | Sweden      | Population register                       | KASPar/TaqMan                      | MI                        | ●●             |                                     |
| NHS           | Nested case-control | USA         | Occupational                              | TaqMan                             | MI                        | ●●●            |                                     |
| ORCADES       | Cohort              | Scotland    | Population register                       | Illumina HumanHap300 BeadChip      | MI                        |                |                                     |
| PennCATH      | Case-control        | USA         | Hospital admissions                       | Illumina IBC 50K array             | CAD                       |                | >50% stenosis                       |
| PIVUS         | Cohort              | Sweden      | Population register                       | Illumina GoldenGate                | MI                        | ●●●            |                                     |
| PROCARDIS     | Case-control        | Europe      | Hospital admissions/general population    | Illumina IBC 50K array             | MI & CAD                  | ●●●            | Stenosis‡                           |
| PROMIS        | Case-control        | Pakistan    | Hospital admissions                       | Illumina IBC 50K / 660-Quad arrays | MI                        | ●●●            |                                     |
| ROTT          | Cohort              | Netherlands | Population register                       | Illumina 550K array                | MI & CAD                  | ●●●            |                                     |
| SARDINIA      | Cohort              | Italy       | Population register                       | Affymetrix 500K array              | MI                        |                |                                     |
| SCARF         | Case-control        | Sweden      | Hospital admissions/general population    |                                    | MI                        | ●●             |                                     |
| SHEEP         | Case-control        | Sweden      | GP lists, electoral roles                 | TaqMan                             | MI                        | ●●●            |                                     |
| ULSAM         | Cohort              | Sweden      | Population register                       | Illumina GoldenGate                | MI                        | ●●             |                                     |
| WGHS          | Cohort              | USA         | Occupational                              | Illumina Infinium II               | MI                        | ●●●            |                                     |

**CAD, angiographically defined coronary stenosis; GP, general practitioner; MI, myocardial infarction.**

\* Study acronyms are listed in the Supplementary Appendix; † Diagnosis of myocardial infarction was based on: ● patient self report, ●● hospital discharge records, ●●● at least 2 of: clinical features, cardiac markers, and ECG;

‡ Angiographically confirmed coronary stenosis from hospital discharge records. § Coronary revascularisation defined as coronary artery bypass graft or percutaneous transluminal coronary angioplasty.



**Supplementary Table 3: Assay methods of studies contributing data to analysis of *IL6R* genotypes and inflammation biomarkers**

| Study         | Soluble-IL-6R |       |               |             | IL-6         |        |               |              | CRP          |              |               |                 | Fibrinogen    |              |               |              |              |
|---------------|---------------|-------|---------------|-------------|--------------|--------|---------------|--------------|--------------|--------------|---------------|-----------------|---------------|--------------|---------------|--------------|--------------|
|               | Acronym*      | n     | Sample source | Assay type  | Manufacturer | n      | Sample source | Assay type   | Manufacturer | n            | Sample source | Assay type      | Manufacturer  | n            | Sample source | Assay type   | Manufacturer |
| ADVANCE       |               |       |               |             |              |        |               |              |              | 301          | Serum         | ITA / ELISA     | Denka Seiken  |              |               |              |              |
| AGES          |               |       |               |             |              |        |               |              |              | 3215         | Serum         | ITA             | RochDiag      |              |               |              |              |
| COPEN         |               |       |               |             |              |        |               |              |              | 8281         | Plasma        | ITA / INA       | Dade Behring  | 8867         | Plasma        | ITA          | BoehrMann    |
| CUDAS/CUPID   |               |       |               |             | 933          | Serum  | ELISA         | R&D Systems  |              | 968          | Serum         | ITA             | RochDiag      | 984          | Plasma        | Clauss       |              |
| DECODE        |               |       |               |             |              |        |               |              |              | 6215         |               |                 |               |              |               |              |              |
| DILGOM        |               |       |               |             | 3941         | Serum  | CIA           | ImmulateDiag |              | 3975         |               |                 |               |              |               |              |              |
| EPIC-NL       |               |       |               |             |              |        |               |              |              | 2427         | Plasma        | ITA             | BeckCoulter   |              |               |              |              |
| FHS-G3        |               |       |               |             | 3494         |        |               |              |              | 3515         |               |                 |               |              |               |              |              |
| FHS-offspring |               |       |               |             | 2667         | Serum  | ELISA         | R&D Systems  |              | 2672         | Plasma        | ELISA           | Dade Behring  | 2671         | Plasma        | Clauss       | DiagStago    |
| Guangzhou     |               |       |               |             | 1235         |        |               |              |              | 1871         |               | ITA             | BioSystems SA |              |               |              |              |
| HealthABC     | 577           | Serum | ELISA         | R&D Systems | 1116         | Serum  | ELISA         | R&D Systems  | 1172         | Serum        | ELISA         | Calbiochem      |               |              |               |              |              |
| INCHIANTI     | 1068          | Serum | ELISA         | BioSource   | 1067         | Serum  | ELISA         | BioSourceInt | 1058         | Serum        | INA           | Dade Behring    | 1058          | Plasma       | Clauss        | DiagStago    |              |
| LOLIPOP       |               |       |               |             |              |        |               |              |              | 4797         | Serum         | ITA             | RochDiag      |              |               |              |              |
| LURIC         |               |       |               |             | 645          | Plasma | ELISA         | R&D Systems  | 647          | Plasma       | INA           | Dade Behring    | 646           |              | Clauss        | Dade Behring |              |
| METSIM        |               |       |               |             |              |        |               |              |              | 1679         | Plasma        | ITA             | RochDiag      |              |               |              |              |
| MOGERAUG      |               |       |               |             | 1662         | Serum  | ELISA         | R&D Systems  | 1660         | Plasma       | IRMA / INA    | Dade Behring    | 1206          | Plasma       | INA           | Dade Behring |              |
| MrOS          |               |       |               |             |              |        |               |              |              | 1980         |               | Quick OrionDiag |               |              |               |              |              |
| NHS           |               |       |               |             | 972          | Plasma | ELISA         | R&D Systems  | 988          | Plasma       | ITA           | Denka Seiken    |               |              |               |              |              |
| ORCADES       |               |       |               |             |              |        |               |              |              | 761          | Plasma        | ELISA           |               | 761          |               |              |              |
| PIVUS         |               |       |               |             | 871          | Serum  | Biochip       | RandoxLab    | 880          |              |               |                 |               |              |               |              |              |
| PROCARDIS     |               |       |               |             |              |        |               |              |              | 2954         | Plasma        | INA             | Dade Behring  | 2954         | Plasma        | Clauss       | InstrLab     |
| ROTT          |               |       |               |             | 379          | Plasma | ELISA         | R&D Systems  | 362          | Serum        | INA           | Image           | 257           | Plasma       | PT-based      | InstrLab     |              |
| SARDINIA      |               |       |               |             | 5325         | Serum  | ELISA         | R&D Systems  | 5138         | Serum        | ELISA         | UniVermont      | 5420          |              |               |              |              |
| SCARF         |               |       |               |             | 374          |        | ELISA         | R&D Systems  | 378          |              |               |                 | 380           | Plasma       | TCA           | InstrLab     |              |
| SHEEP         |               |       |               |             | 1615         | Serum  | ELISA         | DiacloneRes  | 1935         | Plasma       | INA           | Dade Behring    | 2442          | Plasma       | FPT           | In-house     |              |
| ULSAM         |               |       |               |             | 889          | Serum  | ELISA         | R&D Systems  | 941          | Serum        | INA           | Dade Behring    | 445           |              | INA           | BeckCoulter  |              |
| WGHS          |               |       |               |             |              |        |               |              |              | 23178        | Blood         | ITA             | Denka Seiken  | 22262        | Plasma        | ITA          | RochDiag     |
| <b>Total</b>  | <b>1645</b>   |       |               |             | <b>27185</b> |        |               |              |              | <b>83948</b> |               |                 |               | <b>50353</b> |               |              |              |

BeckCoulter, Beckman Coulter; BioSourceInt, BioSource International; BoehrMann, Boehringer Mannheim; CIA, chemiluminescence immunoassay; DiacloneRes, Diaclone Research; DiagStago, Diagnostica Stago; ELISA, enzyme-linked immunosorbent assay; FPT, fibrin polymerization time; ImmulateDiag, Immulate Diagnostic; INA, immunonephelometric assay; InstrLab, Instrumentation Laboratory; IRMA, immunoradiometric assay; ITA, immunoturbidimetry assay; OrionDiag, Orion Diagnostica; PT, prothrombin time; RandoxLab, Randox Laboratories; RochDiag, Roche Diagnostics; TCA, thrombin clotting assay; UniVermont, University of Vermont.

\* Study acronyms are listed in the Supplementary Appendix.

**Supplementary Table 4: Observational studies from the Emerging Risk Factors Collaboration contributing to correlation analyses of inflammatory biomarkers**

| Acronym*     | Study        |                     |                      | IL-6         |               |            |              | CRP          |               |            |              | Fibrinogen   |               |              |                   |
|--------------|--------------|---------------------|----------------------|--------------|---------------|------------|--------------|--------------|---------------|------------|--------------|--------------|---------------|--------------|-------------------|
|              | Total n      | Mean age (SD)       | Male (%)             | n            | Sample source | Assay type | Manufacturer | n            | Sample source | Assay type | Manufacturer | n            | Sample source | Assay type   | Manufacturer      |
| ATTICA       | 1442         | 50.50 (11.00)       | 744 (51.6%)          | 1442         | Serum         | ELISA      | R&D Systems  | 1442         | Serum         | INA        | Behring      | 1180         | Plasma        | ITA          | Dade Behring      |
| BRHS         | 1199         | 51.92 (5.38)        | 1199 (100.0%)        | 1199         | Serum         | ELISA      | R&D Systems  | 1199         | Serum         | MEIA       | Abbott       |              |               |              |                   |
| BRUN         | 817          | 57.86 (11.39)       | 398 (48.7%)          |              |               |            |              | 817          | Plasma        | ITA/INA    | Behring      | 817          | Plasma        | Clauss       |                   |
| CAPS         | 832          | 57.25 (4.58)        | 832 (100.0%)         |              |               |            |              | 832          | Plasma        | EIA        | Behring      | 832          | Plasma        | INA/Clauss   |                   |
| CHS1         | 3865         | 72.33 (5.22)        | 1479 (38.3%)         | 3572         | Plasma        | ELISA      | R&D Systems  | 3865         | Plasma        | ELISA      | In-house     | 3841         | Plasma        | Clauss       |                   |
| CHS2         | 462          | 72.31 (5.22)        | 176 (38.1%)          | 437          | Plasma        | ELISA      | R&D Systems  | 462          | Plasma        | ELISA      | In-house     | 462          | Plasma        | Clauss       |                   |
| COPEN        | 7161         | 59.58 (13.46)       | 3070 (42.9%)         |              |               |            |              | 7161         | Serum         | ITA        | DAKO         | 7161         | Plasma        | ITA          | BoehrMann         |
| FIA          | 1495         | 54.99 (7.61)        | 1074 (71.8%)         | 1495         |               |            |              | 1495         | Plasma        | CIA        | Immulite     |              |               |              |                   |
| FINRISK92    | 446          | 55.49 (5.94)        | 235 (52.7%)          |              |               |            |              | 446          | Serum         | CIA        | Immulite     | 446          | Plasma        | INA          | InstrLab          |
| FINRISK97    | 1156         | 60.92 (8.52)        | 1156 (100.0%)        |              |               |            |              | 1156         | Serum         | ELISA      | Eucardio Lab | 1156         | Plasma        | Clauss       | InstrLab          |
| FLETCHER     | 620          | 56.85 (14.43)       | 478 (77.1%)          | 572          | Plasma        | ELISA      | R&D Systems  | 620          | Plasma        | INA        | Behring      | 618          | Plasma        | INA          | Behring           |
| HPFS         | 730          | 63.11 (8.31)        | 730 (100.0%)         | 729          | Plasma        | ELISA      | R&D Systems  | 730          | Plasma        | ITA        | Denka Seiken | 730          | Plasma        | ITA          | Kamiya Biomedical |
| KIHD         | 1879         | 52.37 (5.36)        | 1879 (100.0%)        |              |               |            |              | 1879         | Serum         | CIA        | Immulite     | 1879         | Plasma        | Clauss       |                   |
| LEADER       | 434          | 67.09 (9.11)        | 434 (100.0%)         |              |               |            |              | 434          | Serum         | CIA        | Immulite     | 434          |               | Clauss       |                   |
| MESA         | 6715         | 62.15 (10.24)       | 3170 (47.2%)         | 6568         | Serum         | ELISA      | R&D Systems  | 6715         | Plasma        | INA        | Behring      | 6700         | Serum         | INA          | Dade Behring      |
| MOGERAUG2    | 1221         | 58.67 (8.42)        | 1221 (100.0%)        |              |               |            |              | 1221         | Serum         | IRMA       | In-house     | 1221         | Plasma        | INA          | Behringwerke      |
| MOGERAUG3    | 3150         | 54.89 (10.43)       | 1595 (50.6%)         |              |               |            |              | 3150         | Serum         | IRMA       | In-house     | 3150         | Plasma        | INA          | Dade Behring      |
| MOSWEGOT     | 675          | 49.04 (9.51)        | 334 (49.5%)          |              |               |            |              | 675          |               |            |              | 675          | Plasma        | Clauss       |                   |
| NHANES3      | 2894         | 60.70 (13.05)       | 1153 (39.8%)         |              |               |            |              | 2894         | Serum         | INA        | Behring      | 2894         | Plasma        | Clauss       | Organon Teknika   |
| NHS          | 712          | 60.33 (6.52)        | 0 (0.0%)             | 679          | Plasma        | ELISA      | R&D Systems  | 712          | Plasma        | ITA        | Denka Seiken | 712          | Plasma        | ITA          | Kamiya Biomedical |
| NSHS         | 1421         | 53.93 (14.91)       | 681 (47.9%)          | 1421         | Plasma        | ELISA      | R&D Systems  | 1421         | Plasma        | INA        | Behring      |              |               |              |                   |
| PRIME        | 891          | 55.22 (2.79)        | 891 (100.0%)         |              |               |            |              | 891          | Plasma        | INA        | Behring      | 891          | Plasma        | Clauss       | DiagStago         |
| QUEBEC       | 1913         | 56.29 (6.94)        | 1913 (100.0%)        |              |               |            |              | 1913         | Plasma        | INA        | Behring      | 1913         |               | Clauss       |                   |
| ROTT         | 1816         | 69.13 (7.99)        | 614 (33.8%)          |              |               |            |              | 1816         | Serum         | INA        | Immagine     | 1816         | Plasma        | PT-based     | InstrLab          |
| SHS          | 3166         | 59.73 (7.86)        | 1148 (36.3%)         |              |               |            |              | 3166         | Plasma        | ELISA      | In-house     | 3166         | Plasma        | Clauss (m)   | DiagStago         |
| SPEED        | 1565         | 57.68 (4.37)        | 1565 (100.0%)        |              |               |            |              | 1565         | Plasma        | EIA        | Behring      | 1565         | Plasma        | INA / Clauss |                   |
| TARFS        | 481          | 51.60 (12.28)       | 241 (50.1%)          |              |               |            |              | 481          | Serum         | INA        | Behring      | 481          | Plasma        | Clauss (m)   | Dade Behring      |
| ULSAM        | 992          | 71.42 (1.74)        | 992 (100.0%)         | 939          | Serum         | ELISA      | R&D Systems  | 992          | Serum         | INA        | Behring      | 435          |               | INA          | BeckCoulter       |
| WHI-HaBPS    | 1369         | 68.42 (6.35)        | 0 (0.0%)             |              |               |            |              | 1369         | Plasma        | ITA        | Denka Seiken | 1369         | Plasma        | Clauss       | DiagStago         |
| WHS          | 27754        | 54.68 (7.08)        | 0 (0.0%)             |              |               |            |              | 27754        | Plasma        | ITA        | Denka Seiken | 27754        | Plasma        | ITA          | Kamiya Biomedical |
| <b>Total</b> | <b>79273</b> | <b>59.22 (8.84)</b> | <b>29402 (37.1%)</b> | <b>19053</b> |               |            |              | <b>79273</b> |               |            |              | <b>74298</b> |               |              |                   |

BeckCoulter, Beckman Coulter; BoehrMann, Boehringer Mannheim; CIA, chemiluminescence immunoassay; DiagStago, Diagnostica Stago; ELISA, enzyme-linked immunosorbent assay; INA, immunonephelometric assay; InstrLab, Instrumentation Laboratory; IRMA, immunoradiometric assay; ITA, immunoturbidimetry assay; m, modified Clauss method.  
**IL-6, interleukin-6; CRP, C-reactive protein.**

\* Study acronyms are listed in the Supplementary Appendix.

Data on inflammation biomarkers were from people without cardiovascular disease.

**Supplementary Table 5: Association of *IL6R* genotype with levels of inflammation markers and risk of coronary heart disease, in analyses restricted to studies based in populations of predominantly white European continental ancestry**

|                                              | <b>Total no. of participants<br/>with available data</b> | <b>Percentage mean difference, or<br/>odds ratio, (95% CI) per minor allele</b> | <b>P-value for<br/>association</b> |
|----------------------------------------------|----------------------------------------------------------|---------------------------------------------------------------------------------|------------------------------------|
| Interleukin-6                                | 24,834                                                   | 13.5% (9.3 to 17.6%)                                                            | 1.5x10 <sup>-10</sup>              |
| C-reactive protein                           | 76,108                                                   | -7.4% (-9.2 to -5.8%)                                                           | 6.9x10 <sup>-18</sup>              |
| Fibrinogen                                   | 50,353                                                   | -1.0% (-1.3 to -0.7%)                                                           | 4.8x10 <sup>-12</sup>              |
| Coronary heart disease<br>cases vs. controls | 42,925 vs. 127,200                                       | 0.963 (0.942 to 0.981)                                                          | 9.9x10 <sup>-5</sup>               |

Odds ratio is presented for coronary heart disease risk. Percentage mean difference was calculated in reference to the overall mean for each marker among common homozygotes.

**Supplementary Table 6: *IL6R* expression in circulating monocytes and macrophages**

| Gene                                | rs4129267 |         | rs4537545 |         |
|-------------------------------------|-----------|---------|-----------|---------|
|                                     | Beta      | P-value | Beta      | P-value |
| <i>Monocytes</i>                    |           |         |           |         |
| <i>MI cases (n=363)</i>             | -0.0272   | 0.26    | -0.0247   | 0.30    |
| <i>Healthy blood donors (n=395)</i> | 0.0337    | 0.19    | 0.0324    | 0.20    |
| <i>Macrophages</i>                  |           |         |           |         |
| <i>MI cases (n=363)</i>             | -0.0103   | 0.45    | -0.0088   | 0.51    |
| <i>Healthy blood donors (n=395)</i> | 0.0309    | 0.13    | 0.0276    | 0.17    |

Data above from participants in the Cardiogenics Consortium (see Appendix for members).

Similarly, no statistically significant associations were seen between either SNP and *IL6R* expression in monocytes from 1,409 healthy individuals from the Gutenberg Heart Study (Genome-wide  $P > 1 \times 10^{-6}$ ; threshold for statistical significance =  $5.87 \times 10^{-12}$ ),<sup>24</sup> in liver cells from 427 European individuals,<sup>27</sup> lymphoblastoid cell lines from multiple European populations,<sup>28</sup> T-cell or lymphoblastoid cell lines from umbilical cords of 75 individuals,<sup>26</sup> or lymphoblastoid cell lines from 166 healthy female twins.<sup>25</sup>

**Supplementary Table 7: Randomized trials contributing to analyses of tocilizumab (TCZ)**

| Study                                | Data source | Patient population | Duration of intervention (weeks) | Intervention (monthly)            | No. of participants contributing data |               |             |             |            |             |             |                   |               |
|--------------------------------------|-------------|--------------------|----------------------------------|-----------------------------------|---------------------------------------|---------------|-------------|-------------|------------|-------------|-------------|-------------------|---------------|
|                                      |             |                    |                                  |                                   | Total                                 | Soluble IL-6R | IL-6        | CRP         | Fibrinogen | HDL-C       | LDL-C       | Total cholesterol | Triglycerides |
| AMBITION <sup>S1</sup>               | Tabular     | RA                 | 24                               | TCZ 8 mg/kg                       | 286                                   | 206           | 171         | 254         | -          | 240         | 224         | 248               | 252           |
|                                      |             |                    |                                  | Placebo + MTX <sup>†</sup>        | 284                                   | 209           | 138         | 248         | -          | 239         | 233         | 243               | 246           |
| Ito <i>et al</i> <sup>S4</sup>       | Published   | CrD                | 12                               | TCZ 8 mg/kg <sup>†</sup>          | 10                                    | 10            | 10          | 10          | 10         | -           | -           | -                 | -             |
|                                      |             |                    |                                  | TCZ/Placebo 8 mg/kg <sup>‡§</sup> | 13                                    | -             | -           | -           | -          | -           | -           | -                 | -             |
|                                      |             |                    |                                  | Placebo <sup>†</sup>              | 13                                    | 13            | 13          | 13          | 13         | -           | -           | -                 | -             |
| LITHE <sup>S5</sup>                  | Tabular     | RA                 | 52                               | TCZ 8 mg/kg + MTX                 | 398                                   | -             | -           | 285         | -          | 271         | 265         | 280               | 282           |
|                                      |             |                    |                                  | TCZ 4 mg/kg + MTX                 | 399                                   | -             | -           | 247         | -          | 239         | 236         | 251               | 252           |
|                                      |             |                    |                                  | Placebo + MTX                     | 393                                   | -             | -           | 157         | -          | 156         | 156         | 157               | 158           |
| Nishimoto <i>et al</i> <sup>S9</sup> | Published   | RA                 | 12                               | TCZ 8 mg/kg                       | 55                                    | -             | -           | -           | 55         | -           | -           | -                 | -             |
|                                      |             |                    |                                  | TCZ 4 mg/kg                       | 54                                    | -             | -           | -           | 54         | -           | -           | -                 | -             |
|                                      |             |                    |                                  | Placebo                           | 53                                    | -             | -           | -           | 53         | -           | -           | -                 | -             |
| OPTION <sup>S11</sup>                | Tabular     | RA                 | 24                               | TCZ 8 mg/kg + MTX                 | 205                                   | 158           | 116         | 167         | -          | 158         | 155         | 169               | 169           |
|                                      |             |                    |                                  | TCZ 4 mg/kg + MTX                 | 213                                   | 143           | 94          | 151         | -          | 151         | 151         | 160               | 160           |
|                                      |             |                    |                                  | Placebo + MTX                     | 204                                   | 119           | 82          | 121         | -          | 111         | 110         | 122               | 122           |
| RADIATE <sup>S13</sup>               | Tabular     | RA                 | 24                               | TCZ 8 mg/kg + MTX                 | 170                                   | 87            | 65          | 117         | -          | 113         | 108         | 115               | 117           |
|                                      |             |                    |                                  | TCZ 4 mg/kg + MTX                 | 161                                   | 88            | 65          | 101         | -          | 100         | 97          | 103               | 105           |
|                                      |             |                    |                                  | Placebo + MTX                     | 158                                   | 47            | 37          | 61          | -          | 65          | 64          | 67                | 67            |
| SAMURAI <sup>S15</sup>               | Published   | RA                 | 12                               | TCZ 8 mg/kg                       | 9                                     | -             | 9           | 9           | -          | -           | -           | -                 | -             |
|                                      |             |                    |                                  | DMARDs                            | 10                                    | -             | 10          | 10          | -          | -           | -           | -                 | -             |
| SATORI <sup>S17</sup>                | Published   | RA                 | 24                               | TCZ 8 mg/kg                       | 53                                    | -             | -           | 53          | -          | -           | -           | -                 | -             |
|                                      |             |                    |                                  | MTX                               | 37                                    | -             | -           | 37          | -          | -           | -           | -                 | -             |
| TOWARD <sup>S21</sup>                | Tabular     | RA                 | 24                               | TCZ 8 mg/kg + DMARDs              | 803                                   | 516           | 413         | 686         | -          | 645         | 617         | 672               | 682           |
|                                      |             |                    |                                  | Placebo + DMARDs                  | 413                                   | 269           | 194         | 301         | -          | 285         | 280         | 298               | 302           |
| <b>Total</b>                         |             |                    |                                  |                                   | <b>4394</b>                           | <b>1865</b>   | <b>1417</b> | <b>3028</b> | <b>185</b> | <b>2773</b> | <b>2696</b> | <b>2885</b>       | <b>2914</b>   |

**CrD, Crohn's disease; CRP, C-reactive protein; DMARDs, disease-modifying antirheumatic drugs; IL, interleukin; JIA, juvenile idiopathic arthritis; MTX, methotrexate; RA, rheumatoid arthritis.**

<sup>†</sup> Received rescue therapy (TCZ 8mg/kg) on worsening of symptoms at the investigator's discretion; <sup>‡</sup> Intervention was administered biweekly; <sup>§</sup> Intervention was alternating injections of tocilizumab and placebo; - did not provide sufficient information to be included in analysis.

References for each of the studies listed in this table are provided in the Supplementary Appendix.

Supplementary Figure 1: Genomic location and linkage disequilibrium among the *IL6R* variants assessed

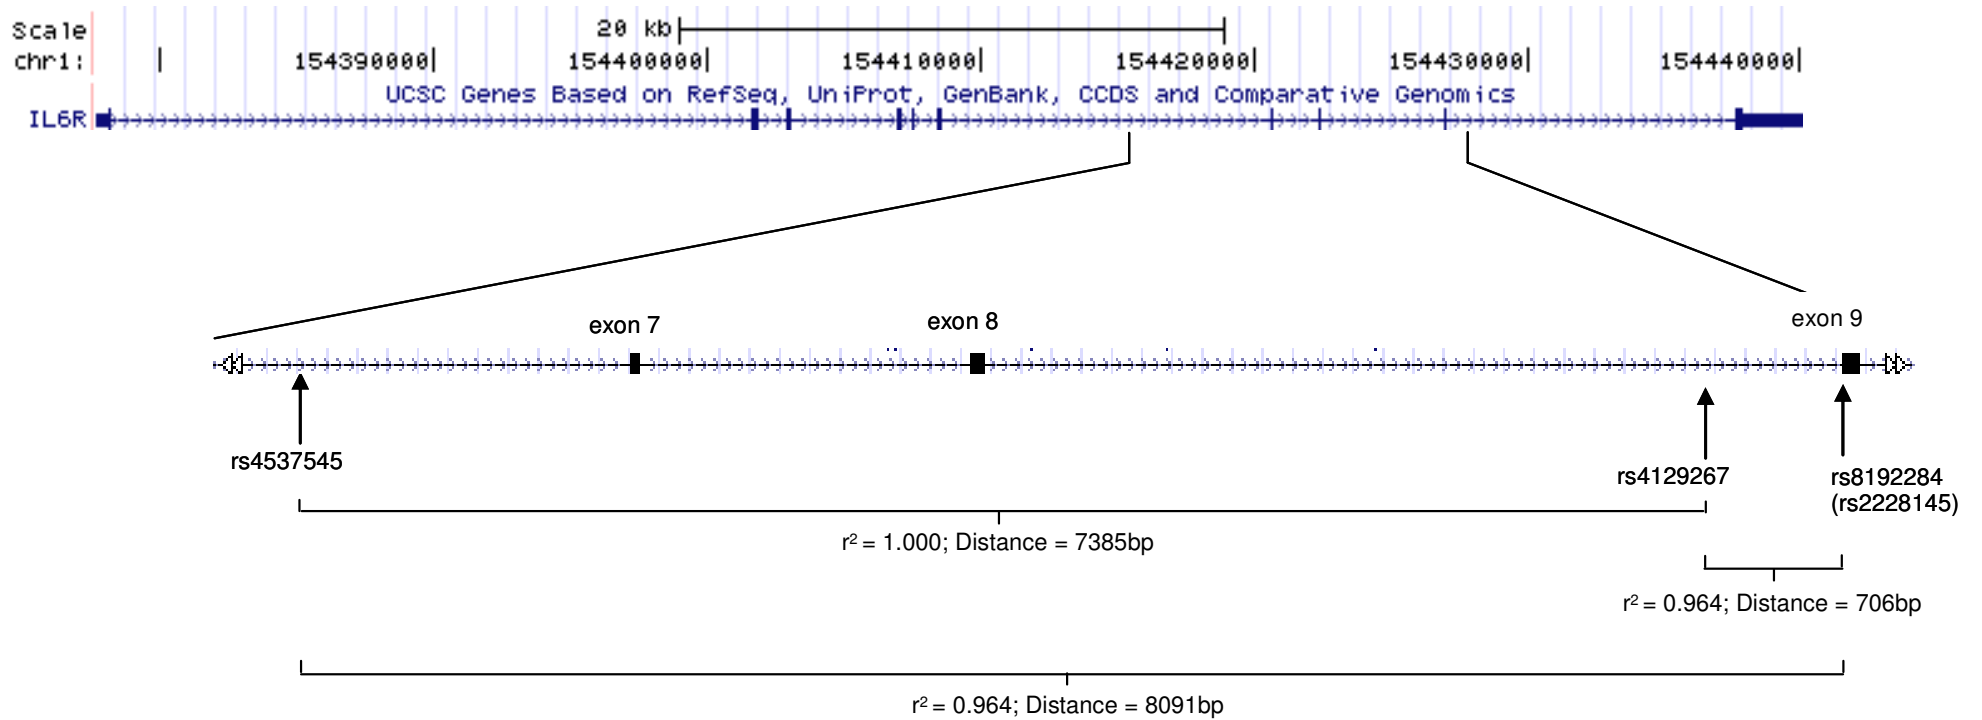

$r^2$  values are based on the CEU HapMap2 population. rs4537545 represents a C>T exchange; rs8192284 represents Asp358Ala; rs4129267 represents a C>T exchange. rs8192284 has recently been merged into rs2228145. In all genetic analyses, "1/1" is used to denote common homozygotes, "1/2" for heterozygotes and "2/2" for rare homozygotes.

**Supplementary Figure 2: Association of *IL6R* genotype with inflammation markers, by study characteristics**

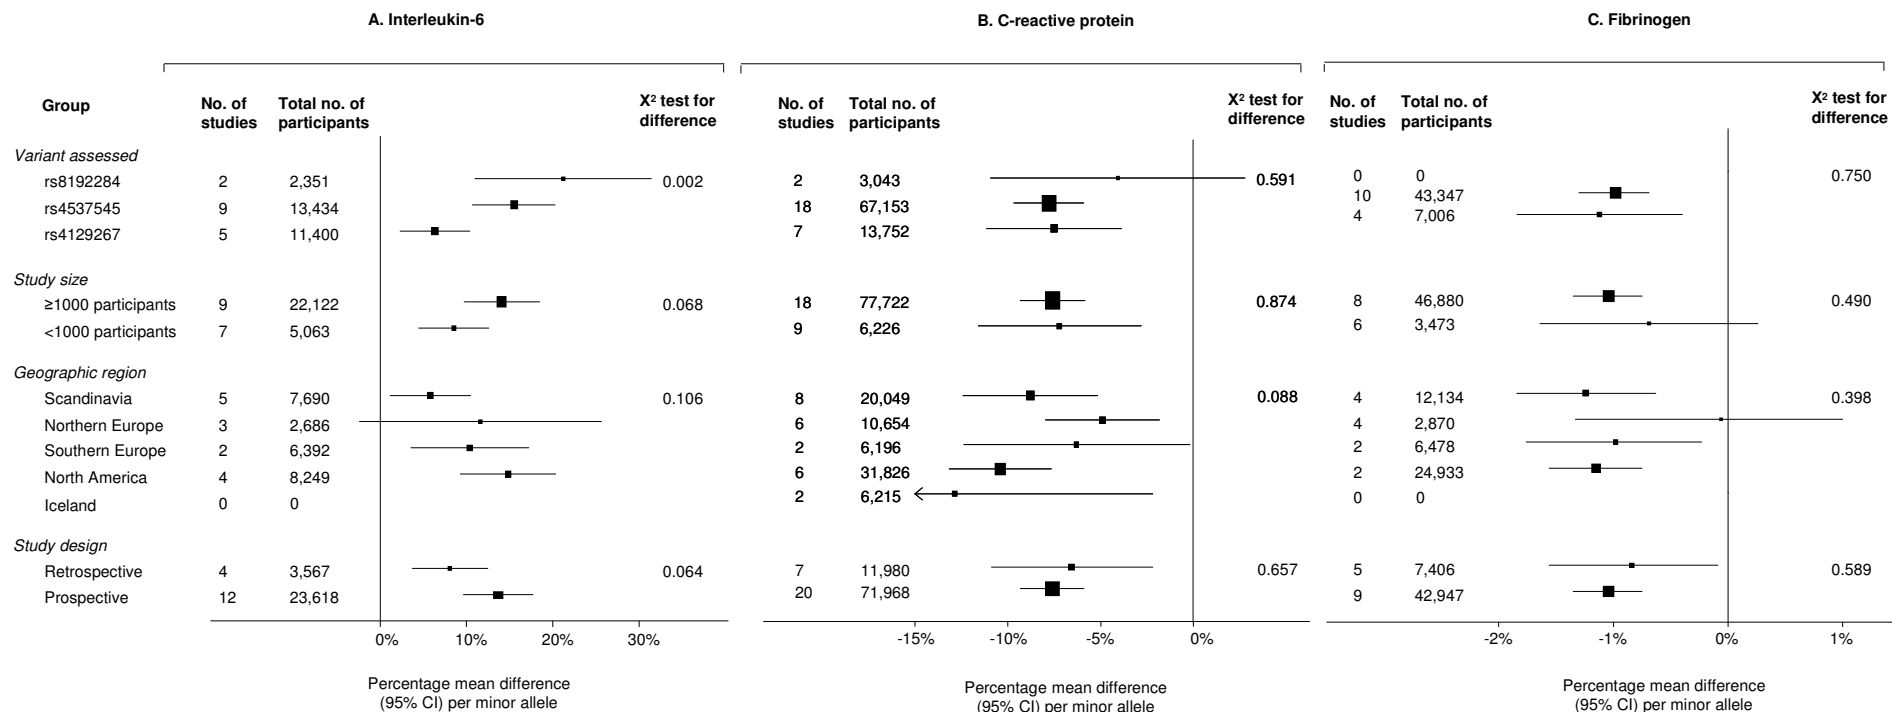

Percentage mean difference was calculated in reference to the overall mean for each markers among common homozygotes

Assessments of overall heterogeneity: A.  $\chi^2_{14} = 17.5$  ( $P = 0.233$ );  $I^2 = 20\%$  (0% to 56%). B.  $\chi^2_{24} = 38.8$  ( $P = 0.03$ );  $I^2 = 38\%$  (0% to 62%). C.  $\chi^2_{13} = 15.3$  ( $P = 0.29$ );  $I^2 = 15\%$  (0% to 53%)  
 Single outlying studies were excluded for IL-6 (Guangzhou Chinese study: 40% mean difference per minor allele) and CRP (Rotterdam study: -36% mean difference per minor allele).

Supplementary Figure 3: IL-6 production by monocytes following lipopolysaccharide (LPS) stimulation, by *IL6R* rs4537545 genotype

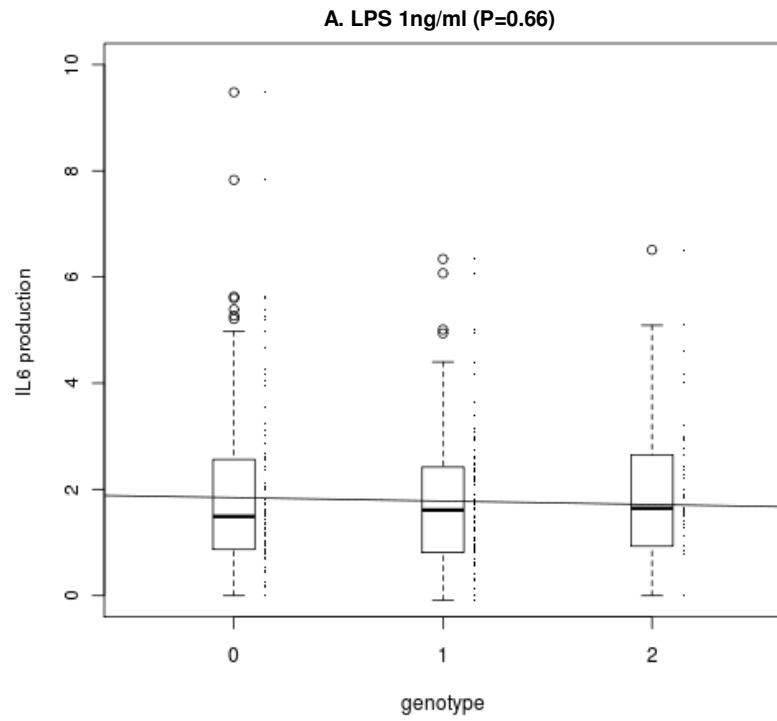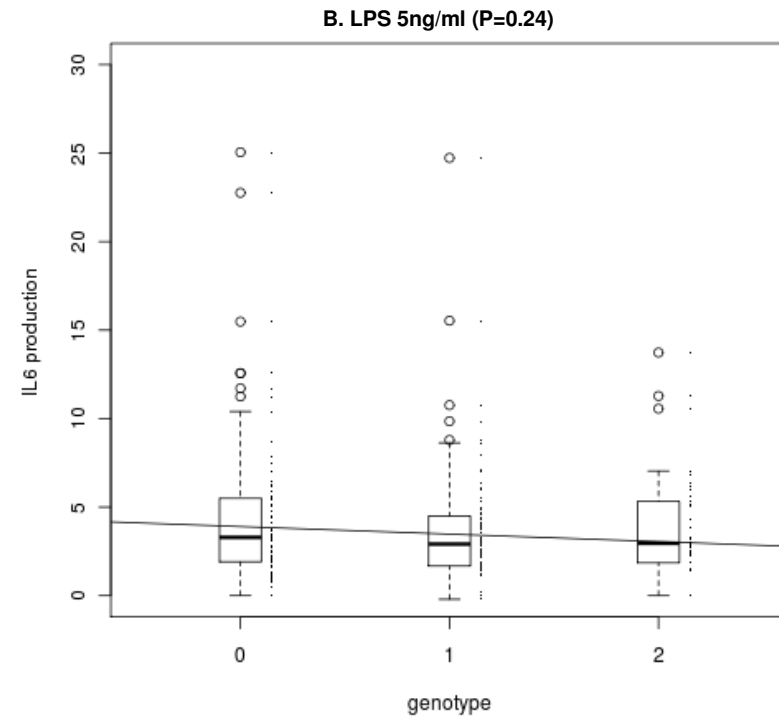



Supplementary Figure 4: Association of *IL6R* genotype with coronary heart disease risk, by study characteristics

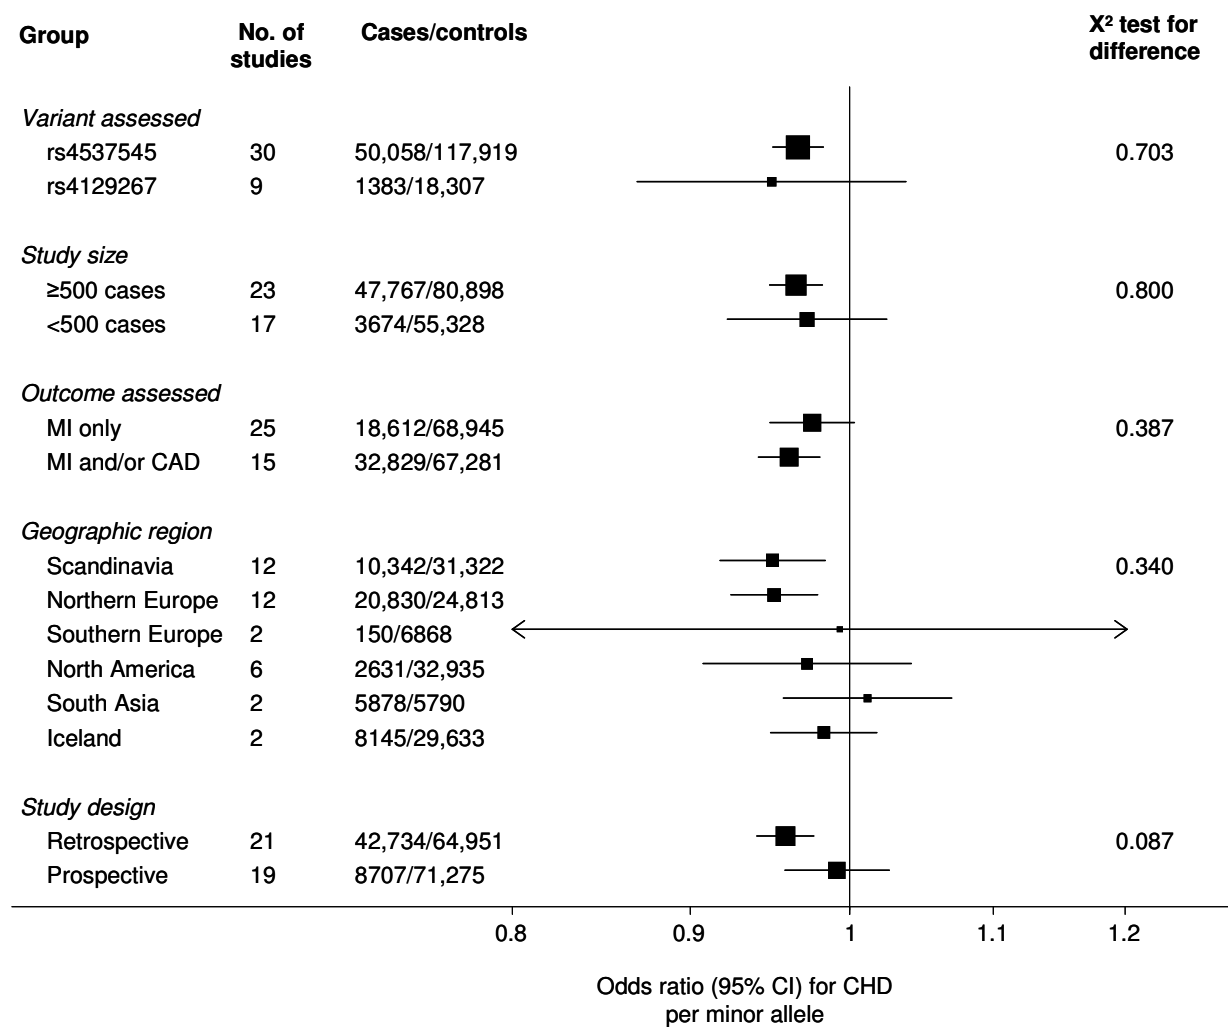

Assessment of overall heterogeneity:  $X^2_{38} = 44.84$  ( $P=0.21$ );  $I^2 = 15\%$  (0% to 43%).

Excludes categories containing only 1 study (geographic region = Australia) and studies that cross multiple categories (eg, studies based across multiple parts of Europe).

Supplementary Figure 5: Tocilizumab intervention in randomized trials and circulating lipid concentrations

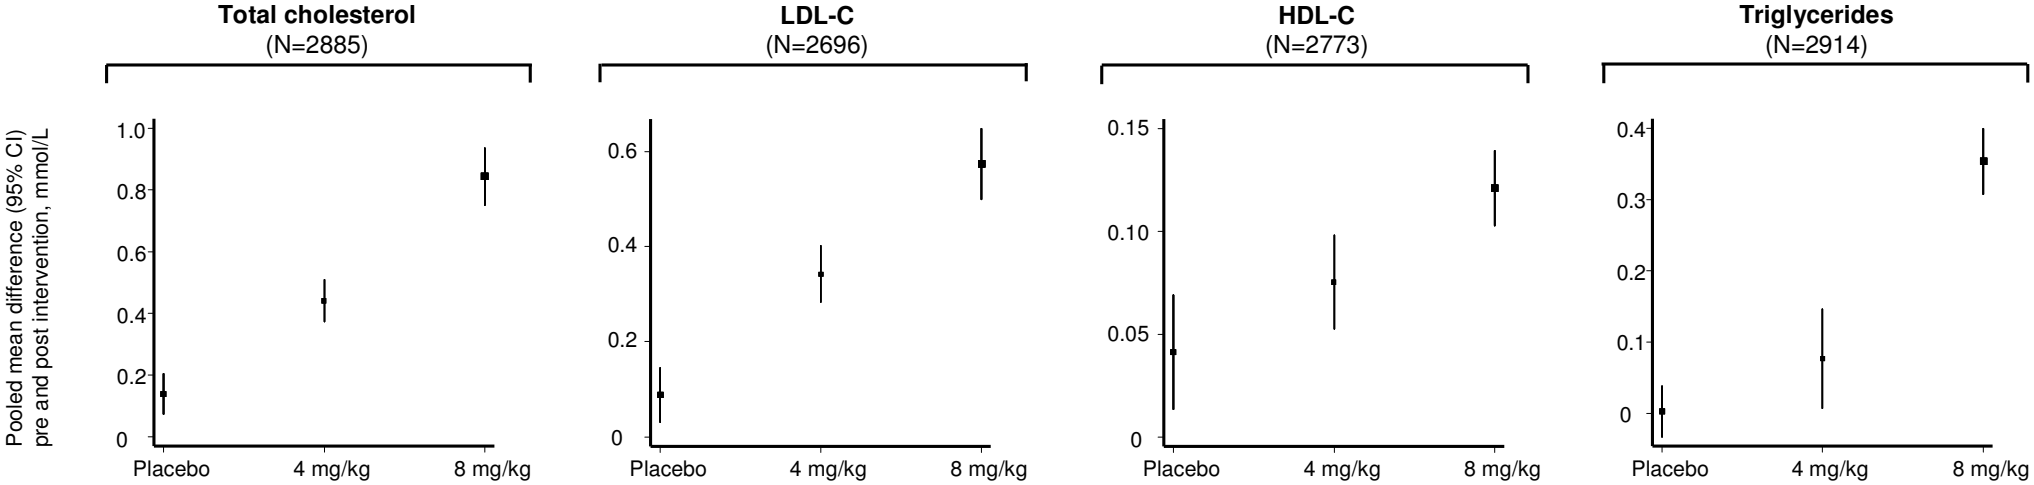

Vertical lines represent 95% confidence intervals. Details of trials contributing to these analyses are provided in Supplementary Table 7.

## Supplementary Figure 6: Tocilizumab intervention in randomized trials and circulating concentrations of inflammation markers

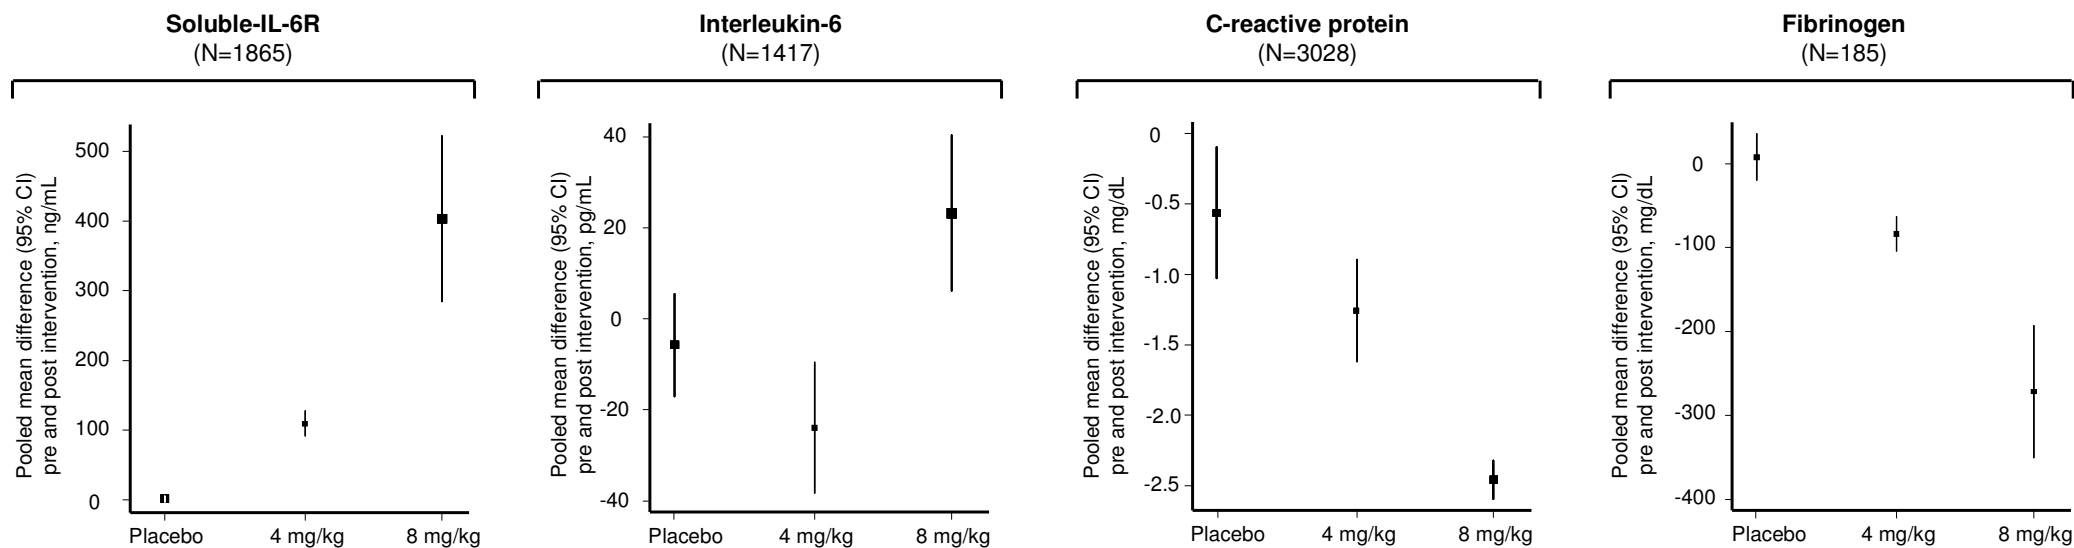

Vertical lines represent 95% confidence intervals. Details of trials contributing to these analyses are provided in Supplementary Table 7.

By comparison, the absolute mean differences (95% CI) seen by *IL6R* genotype displayed in Figure 1 are:

|                      |                           |                           |
|----------------------|---------------------------|---------------------------|
| sIL6-R (ng/ml):      | 1/2: +10.4 (+8.9, +11.9)  | 2/2: +22.5 (+18.7, 26.3)  |
| IL6 (ng/L):          | 1/2: +0.16 (+0.09, +0.24) | 2/2: +0.56 (+0.40, +0.71) |
| CRP (mg/L):          | 1/2: -0.1 (-0.2, -0.05)   | 2/2: -0.4 (-0.5, -0.3)    |
| Fibrinogen (umol/L): | 1/2: -0.06 (-0.10, -0.01) | 2/2: -0.23 (-0.29, -0.16) |

## Supplementary Figure 7: Heterogeneity in randomized trials of tocilizumab and inflammatory biomarkers

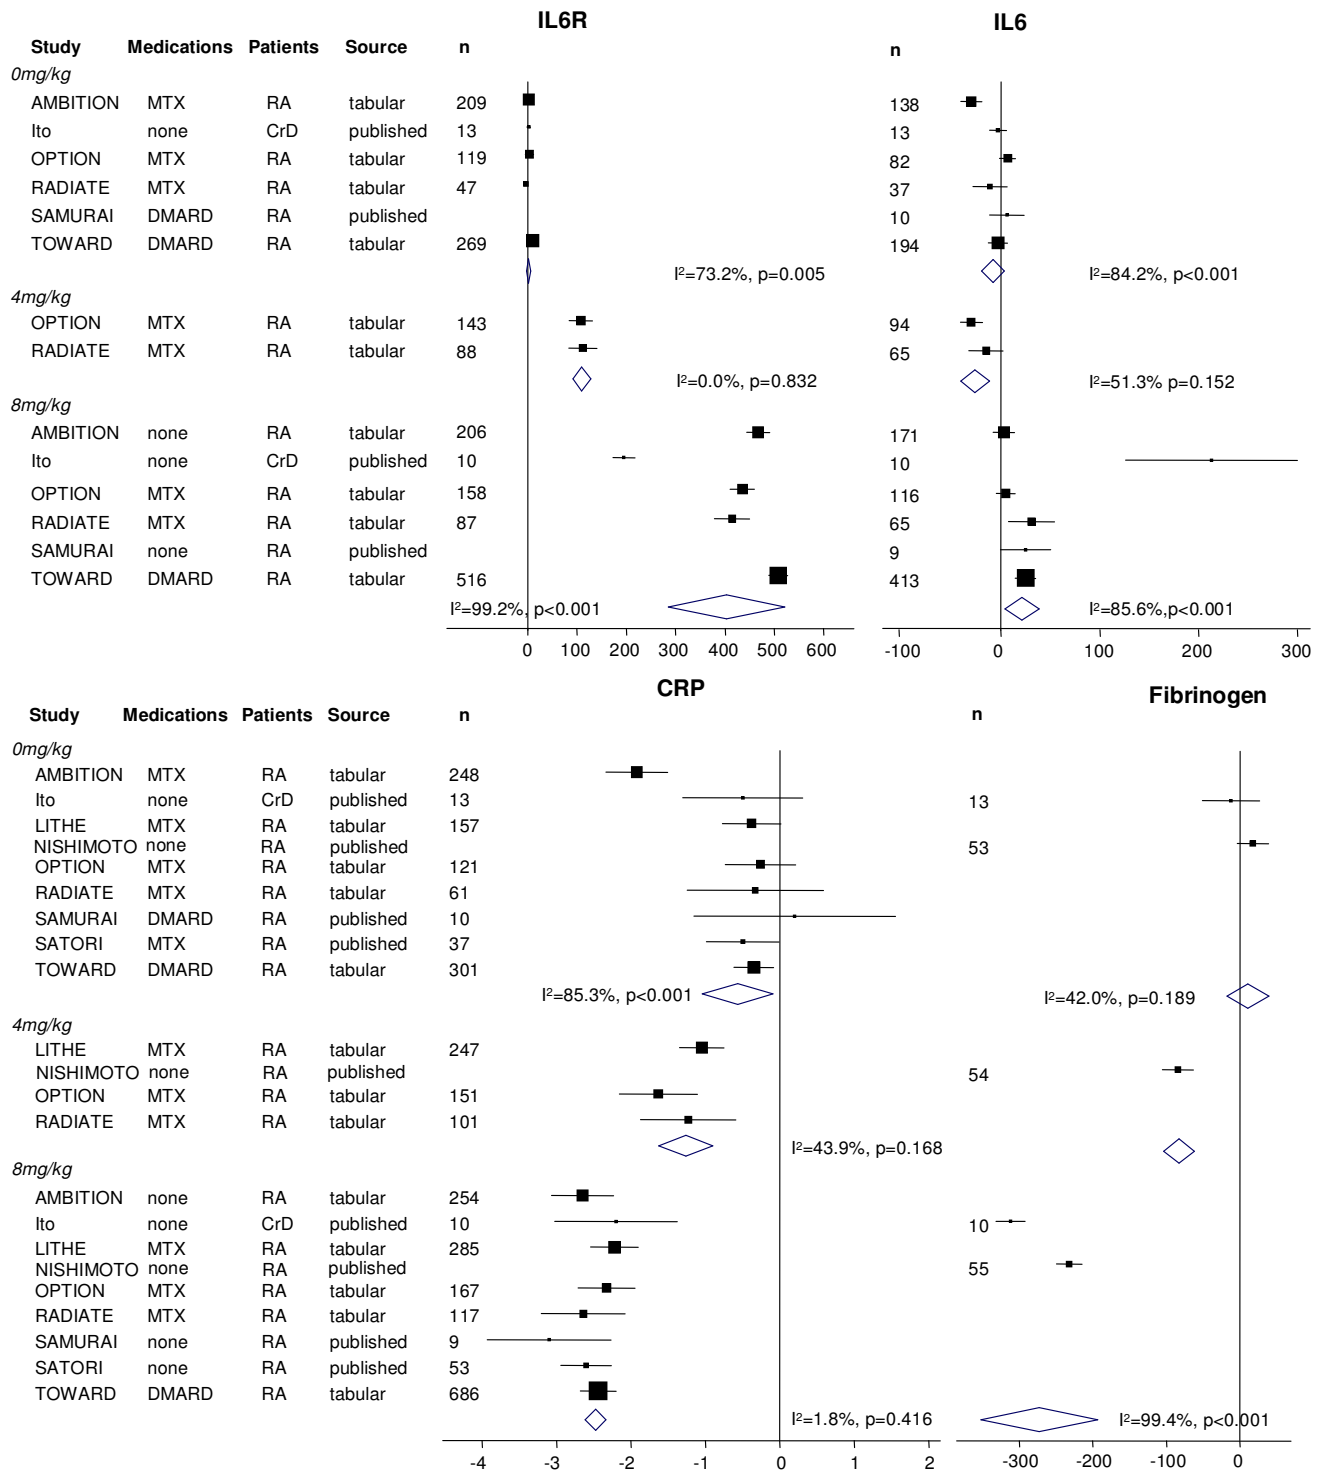

Box sizes are proportional to the number of participants in each trial.

After exclusion of 2 outlying trials - (1) the AMBITION trial, the only trial to use methotrexate in a "methotrexate-naïve" population in its placebo arm, (2) the Ito trial, the only trial set in Crohn's disease patients, pooled mean differences (95% CI) and heterogeneity statistics were:

**IL-6R:** 0mg/kg 3 (-6,11),  $I^2=77\%$ ,  $p=0.01$ . 4mg/kg 110 (91,128),  $I^2=0\%$ ,  $p=0.83$ . 8mg/kg 453 (394,513),  $I^2=94\%$ ,  $p<0.001$ .

**IL-6:** 0mg/kg 0.9 (-6.8,8.5),  $I^2=38\%$ ,  $p=0.18$ . 4mg/kg -24.0 (-38.4,-9.6),  $I^2=51\%$ ,  $p=0.15$ . 8mg/kg 19.5 (5.8,33.2),  $I^2=70\%$ ,  $p=0.02$ .

**CRP:** 0mg/kg -0.35 (-0.53,-0.17),  $I^2=0\%$ ,  $p=0.95$ . 4mg/kg -1.26 (-1.62,-0.90),  $I^2=44\%$ ,  $p=0.17$ . 8mg/kg -2.45 (-2.61,-2.28),  $I^2=15\%$ ,  $p=0.32$ .

**Fibrinogen:** 0mg/kg 18 (-3,39). 4mg/kg -84 (-105,-63). 8mg/kg -232 (-249,-214).

## Supplementary Figure 8: Heterogeneity in randomized trials of tocilizumab and lipids

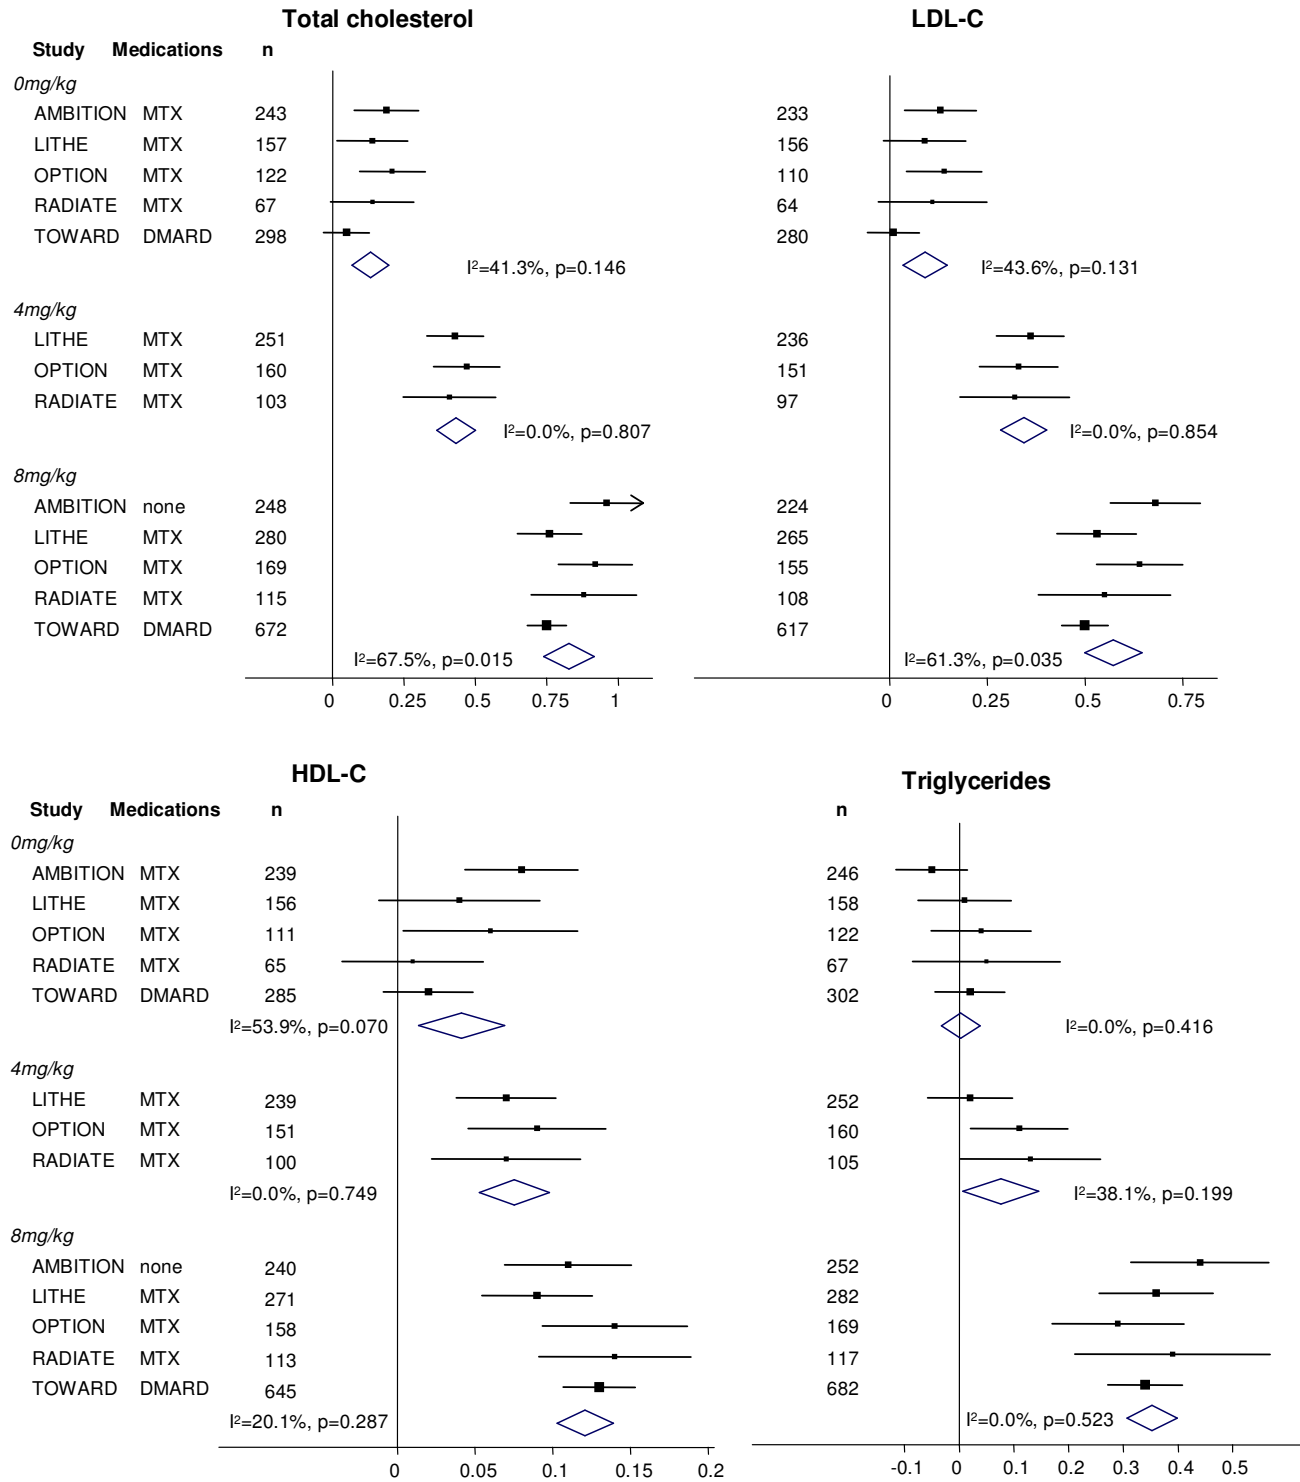

Box sizes are proportional to the number of participants in each trial.

After exclusion of 1 outlying trial - the AMBITION trial, the only trial to use methotrexate in a "methotrexate-naïve" population in its placebo arm, pooled mean differences (95% CI) and heterogeneity statistics were:

**Total cholesterol:** 0mg/kg 0.13 (0.05,0.20), I<sup>2</sup>=45%,p=0.14. 4mg/kg 0.44 (0.37,0.51), I<sup>2</sup>=0%,p=0.81. 8mg/kg 0.81 (0.73,0.89), I<sup>2</sup>=53%,p=0.10.

**LDL-C:** 0mg/kg 0.08 (0.01,0.14), I<sup>2</sup>=46%,p=0.14. 4mg/kg 0.34 (0.28,0.40), I<sup>2</sup>=0%,p=0.85. 8mg/kg 0.54 (0.48,0.61), I<sup>2</sup>=38%,p=0.18.

**HDL-C:** 0mg/kg 0.03 (0.01,0.05), I<sup>2</sup>=0%,p=0.51. 4mg/kg 0.08 (0.05,0.10), I<sup>2</sup>=0%,p=0.749. 8mg/kg 0.12 (0.10,0.15), I<sup>2</sup>=35%,p=0.20.

**Triglycerides:** 0mg/kg 0.03 (-0.02,0.07), I<sup>2</sup>=0%,p=0.94. 4mg/kg 0.08 (0.01,0.15), I<sup>2</sup>=38%,p=0.20. 8mg/kg 0.34 (0.29,0.39), I<sup>2</sup>=0%,p=0.78.

## Supplementary Appendix.

## List of acronyms for the genetic studies

| Study Acronym | Study Name                                                                                                      |
|---------------|-----------------------------------------------------------------------------------------------------------------|
| ADVANCE       | Action in Diabetes and Vascular Disease: Preterax and Diamicon Modified-Release Controlled Evaluation           |
| AGES          | AGES Reykjavik Study: The Reykjavik Study of Healthy Aging for the New Millennium                               |
| BHF-FHS       | British Heart Foundation Family Heart Study                                                                     |
| BLOODOMICS-1  | Bloodomics Consortium, Dutch Part                                                                               |
| BLOODOMICS-2  | Bloodomics Consortium, German Part                                                                              |
| CIHDS         | Copenhagen Ischemic Heart Disease Study                                                                         |
| COPEN         | Copenhagen City Heart Study                                                                                     |
| COROGENE      | Genetic Predisposition of Coronary Heart Disease in Patients Verified with Coronary Angiogram?                  |
| CUDAS / CUPID | Carotid Ultrasound Disease Assessment Study / Carotid Ultrasound in Patients with Ischaemic Heart Disease Study |
| DECODE        | Diabetes Epidemiology: Collaborative Analysis of Diagnostic Criteria in Europe                                  |
| DILGOM        | Dietary, Lifestyle and Genetic Determinants of Obesity and Metabolic Syndrome Study                             |
| EPIC-NL       | European Prospective Investigation into Cancer and Nutrition, Netherlands Centre                                |
| FHS-G3        | Framingham Generation Three Cohort                                                                              |
| FHS-offspring | Framingham Offspring Cohort                                                                                     |
| Framingham    | Framingham Heart Study                                                                                          |
| FUSION_1      | Finland-United States Investigation of NIDDM Genetics Study 1                                                   |
| FUSION_2      | Finland-United States Investigation of NIDDM Genetics Study 2                                                   |
| GerMIFS_1     | German MI Family Study 1                                                                                        |
| GerMIFS_2     | German MI Family Study 2                                                                                        |
| GLACIER       | Gene x Lifestyle Interactions And Complex Traits Involved in Elevated Disease Risk Study                        |
| Guangzhou     | Guangzhou Biobank Cohort Study                                                                                  |
| HealthABC     | Health, Aging, and Body Composition Study                                                                       |
| HPS           | Heart Protection Study                                                                                          |
| HUNT          | Nord-Trøndelag Health Study                                                                                     |
| HVHS          | Heart and Vascular Health Study                                                                                 |
| INCHIANTI     | Invecchiare in Chianti Study                                                                                    |
| InterHeart-1  | InterHeart Study, Indian Asian Part                                                                             |
| InterHeart-2  | InterHeart Study, European Part                                                                                 |
| ISIS          | International Study of Infarct Survival                                                                         |
| LOLIPOP       | London Life Sciences Prospective Population Study                                                               |
| LURIC         | Ludwigshafen Risk and Cardiovascular Health Study                                                               |
| METSIM        | Metabolic Syndrome In Men Study                                                                                 |
| MOGERAUG      | MONICA/KORA Augsburg                                                                                            |
| MrOS          | Osteoporotic Fractures in Men Study                                                                             |
| NHS           | Nurses' Health Study                                                                                            |
| ORCADES       | Orkney Complex Disease Study                                                                                    |
| PennCATH      | University of Pennsylvania Catheterization Study                                                                |
| PIVUS         | Prospective Investigation of the Vasculature in Uppsala Seniors Study                                           |
| PROCARDIS     | Precocious Coronary Artery Disease Study                                                                        |
| PROMIS        | Pakistan Risk of Myocardial Infarction Study                                                                    |
| ROTT          | The Rotterdam Study                                                                                             |
| SARDINIA      | Sardinia Study of Aging                                                                                         |
| SCARF         | Stockholm Coronary Artery Risk Factor Study                                                                     |
| SHEEP         | Stockholm Heart Epidemiology Program                                                                            |
| ULSAM         | Uppsala Longitudinal Study of Adult Men                                                                         |
| WGHS          | Women's Genome Health Study                                                                                     |

## List of acronyms for the observational studies (ERFC)

| <b>Study Acronym</b> | <b>Study Name</b>                                                              |
|----------------------|--------------------------------------------------------------------------------|
| ATTICA               | ATTICA Study                                                                   |
| BRHS                 | British Regional Heart Study                                                   |
| BRUN                 | Bruneck Study                                                                  |
| CAPS                 | Caerphilly Study                                                               |
| CHS1                 | Original cohort of the Cardiovascular Health Study                             |
| CHS2                 | Supplemental African-American cohort of the Cardiovascular Health Study        |
| COPEN                | Copenhagen City Heart Study                                                    |
| FIA                  | First Myocardial Infarction in Northern Sweden                                 |
| FINRISK92            | Finrisk Cohort 1992                                                            |
| FINRISK97            | Finrisk Cohort 1997                                                            |
| FLETCHER             | Fletcher Challenge Blood Study                                                 |
| HPFS                 | Health Professionals Follow-Up Study                                           |
| KIHD                 | Kuopio Ischaemic Heart Disease Study                                           |
| LEADER               | Lower Extremity Arterial Disease Event Reduction Trial                         |
| MESA                 | Multi-Ethnic Study of Atherosclerosis                                          |
| MOGERAUG2            | MONICA/KORA Augsburg Surveys S2                                                |
| MOGERAUG3            | MONICA/KORA Augsburg Surveys S3                                                |
| MOSWEGOT             | MONICA Göteborg Study                                                          |
| NHANES3              | Third National Health and Nutrition Examination Survey                         |
| NHS                  | Nurses' Health Study                                                           |
| NSHS                 | Nova Scotia Health Survey                                                      |
| PRIME                | Prospective Epidemiological Study of Myocardial Infarction                     |
| QUEBEC               | Québec Cardiovascular Study                                                    |
| ROTT                 | The Rotterdam Study                                                            |
| SHS                  | Strong Heart Study                                                             |
| SPEED                | Speedwell Study                                                                |
| TARFS                | Turkish Adult Risk Factor Study                                                |
| ULSAM                | Uppsala Longitudinal Study of Adult Men                                        |
| WHI-HaBPS            | Women's Health Initiative (Hormones and Biomarkers Predicting Stroke in Women) |
| WHS                  | Women's Health Study                                                           |

## Search strategy used to identify published reports on tocilizumab

Published studies were identified through electronic searches using Medline and by scanning reference lists of articles identified for all relevant studies (including review articles). The computer-based searches combined search terms related to tocilizumab without language restriction.

Pubmed strategy:

atlizumab OR tocilizumab OR Actemra OR RoActemra OR (MRA AND ("Interleukin 6" OR "Plasmacytoma Growth Factor" OR "Growth Factor, Plasmacytoma" OR "B-Cell Differentiation Factor-2" OR "B Cell Differentiation Factor 2" OR "B-Cell Stimulatory Factor 2" OR "B-Cell Stimulatory Factor-2" OR "BSF-2" OR "Differentiation Factor, B-Cell" OR "Differentiation Factor, B Cell" OR "Differentiation Factor-2, B-Cell" OR "Differentiation Factor 2, B Cell" OR "Hepatocyte-Stimulating Factor" OR "Hepatocyte Stimulating Factor" OR "Hybridoma Growth Factor" OR "Growth Factor, Hybridoma" OR "IFN-beta 2" OR "IL-6" OR "IL6" OR "MGI-2" OR "Myeloid Differentiation-Inducing Protein" OR "Differentiation-Inducing Protein, Myeloid" OR "Myeloid Differentiation Inducing Protein" OR "B Cell Stimulatory Factor-2" OR "B Cell Stimulatory Factor 2" OR "B-Cell Differentiation Factor" OR "B Cell Differentiation Factor"))

References:

- S1. Jones G, Sebba A, Gu J, Lowenstein MB, Calvo A, Gomez-Reino JJ, Siri DA, Tomsic M, Alecock E, Woodworth T, Genovese MC. Comparison of tocilizumab monotherapy versus methotrexate monotherapy in patients with moderate to severe rheumatoid arthritis: the AMBITION study. *Ann Rheum Dis*. 2010;69(1):88–96.
- S2. Maini RN, Taylor PC, Szechinski J, Pavelka K, Bröll J, Balint G, Emery P, Raemen F, Petersen J, Smolen J, Thomson D, Kishimoto T; CHARISMA Study Group. Double-blind randomized controlled clinical trial of the interleukin-6 receptor antagonist, tocilizumab, in European patients with rheumatoid arthritis who had an incomplete response to methotrexate. *Arthritis Rheum*. 2006;54(9):2817–29.
- S3. Choy EH, Isenberg DA, Garrood T, Farrow S, Ioannou Y, Bird H, Cheung N, Williams B, Hazleman B, Price R, Yoshizaki K, Nishimoto N, Kishimoto T, Panayi GS. Therapeutic benefit of blocking interleukin-6 activity with an anti-interleukin-6 receptor monoclonal antibody in rheumatoid arthritis: a randomized, double-blind, placebo-controlled, dose-escalation trial. *Arthritis Rheum*. 2002;46(12):3143–50.
- S4. Ito H, Takazoe M, Fukuda Y, Hibi T, Kusugami K, Andoh A, Matsumoto T, Yamamura T, Azuma J, Nishimoto N, Yoshizaki K, Shimoyama T, Kishimoto T. A pilot randomized trial of a human anti-interleukin-6 receptor monoclonal antibody in active Crohn's disease. *Gastroenterology*. 2004;126(4):989–96.
- S5. Kremer JL, Blanco R, Brzosko M, Burgos-Vargas R, Halland AM, Vernon E, Ambts P, Fleischmann R. Tocilizumab inhibits structural joint damage in rheumatoid arthritis patients with inadequate responses to methotrexate at 1 year: The LITHE study. *Arthritis Rheum*. 2010 Nov. [Epub ahead of print]
- S6. Nakashima Y, Kondo M, Harada H, Horiuchi T, Ishinishi T, Jojima H, Kuroda K, Miyahara H, Nagamine R, Nakashima H, Otsuka T, Saikawa I, Shono E, Suematsu E, Tsuru T, Wada K, Iwamoto Y. Clinical evaluation of tocilizumab for patients with active rheumatoid arthritis refractory to anti-TNF biologics: tocilizumab in combination with methotrexate. *Mod Rheumatol*. 2010;20(4):343–52.



- S7. Nishimoto N, Yoshizaki K, Maeda K, Kuritani T, Deguchi H, Sato B, Imai N, Suemura M, Kakehi T, Takagi N, Kishimoto T. Toxicity, pharmacokinetics, and dose-finding study of repetitive treatment with the humanized anti-interleukin 6 receptor antibody MRA in rheumatoid arthritis. Phase I/II clinical study. *J Rheumatol*. 2003;30(7):1426–35.
- S8. Nishimoto N, Terao K, Mima T, Nakahara H, Takagi N, Kakehi T. Mechanisms and pathologic significances in increase in serum interleukin-6 (IL-6) and soluble IL-6 receptor after administration of an anti-IL-6 receptor antibody, tocilizumab, in patients with rheumatoid arthritis and Castleman disease. *Blood*. 2008;112(10):3959–64.
- S9. Nishimoto N, Yoshizaki K, Miyasaka N, Yamamoto K, Kawai S, Takeuchi T, Hashimoto J, Azuma J, Kishimoto T. Treatment of rheumatoid arthritis with humanized anti-interleukin-6 receptor antibody: a multicenter, double-blind, placebo-controlled trial. *Arthritis Rheum*. 2004;50(6):1761–9.
- S10. Nishimoto N, Kanakura Y, Aozasa K, Johkoh T, Nakamura M, Nakano S, Ikeda Y, Sasaki T, Nishioka K, Hara M, Taguchi H, Kimura Y, Kato Y, Asaoku H, Kumagai S, Kodama F, Nakahara H, Hagihara K, Yoshizaki K, Kishimoto T. Humanized anti-interleukin-6 receptor antibody treatment of multicentric Castleman disease. *Blood*. 2005;106(8):2627–32.
- S11. Smolen JS, Beaulieu A, Rubbert-Roth A, Ramos-Remus C, Rovensky J, Alecock E, Woodworth T, Alten R; OPTION Investigators. Effect of interleukin-6 receptor inhibition with tocilizumab in patients with rheumatoid arthritis (OPTION study): a double-blind, placebo-controlled, randomised trial. *Lancet*. 2008;371(9617):987–97.
- S12. Puéchal X, Debandt M, Berthelot JM, Breban M, Dubost JJ, Fain O, Kahn JE, Lequen L, Longy-Boursier M, Perdriger A, Schaeveerbeke T, Toussiroit E, Sibilia J; Club Rhumatismes Et Inflammation. Tocilizumab in refractory adult Still's disease. *Arthritis Care Res (Hoboken)*. 2011;63(1):155–9.
- S13. Emery P, Keystone E, Tony HP, Cantagrel A, van Vollenhoven R, Sanchez A, Alecock E, Lee J, Kremer J. IL-6 receptor inhibition with tocilizumab improves treatment outcomes in patients with rheumatoid arthritis refractory to anti-tumour necrosis factor biologicals: results from a 24-week multicentre randomised placebo-controlled trial. *Ann Rheum Dis*. 2008;67(11):1516–23.
- S14. Yamanaka H, Tanaka Y, Inoue E, Hoshi D, Momohara S, Hanami K, Yunoue N, Saito K, Amano K, Kameda H, Takeuchi T. Efficacy and tolerability of tocilizumab in rheumatoid arthritis patients seen in daily clinical practice in Japan: results from a retrospective study (REACTION study). *Mod Rheumatol*. 2010 Oct. [Epub ahead of print]
- S15. Kawashiri SY, Kawakami A, Yamasaki S, Imazato T, Iwamoto N, Fujikawa K, Aramaki T, Tamai M, Nakamura H, Ida H, Origuchi T, Ueki Y, Eguchi K. Effects of the anti-interleukin-6 receptor antibody, tocilizumab, on serum lipid levels in patients with rheumatoid arthritis. *Rheumatol Int*. 2011;31(4):451-6.
- S16. Nishimoto N, Miyasaka N, Yamamoto K, Kawai S, Takeuchi T, Azuma J, Kishimoto T. Study of active controlled tocilizumab monotherapy for rheumatoid arthritis patients with an inadequate response to methotrexate (SATORI): significant reduction in disease activity and serum vascular endothelial growth factor by IL-6 receptor inhibition therapy. *Mod Rheumatol*. 2009;19(1):12–19.

- S17. Nishimoto N, Takagi N. Assessment of the validity of the 28-joint disease activity score using erythrocyte sedimentation rate (DAS28-ESR) as a disease activity index of rheumatoid arthritis in the efficacy evaluation of 24-week treatment with tocilizumab: subanalysis of the SATORI study. *Mod Rheumatol*. 2010;20(6):539–47.
- S18. Schultz O, Oberhauser F, Saech J, Rubbert-Roth A, Hahn M, Krone W, Laudes M. Effects of inhibition of interleukin-6 signalling on insulin sensitivity and lipoprotein (a) levels in human subjects with rheumatoid diseases. *PLoS One*. 2010;13;5(12):e14328.
- S19. Song SN, Tomosugi N, Kawabata H, Ishikawa T, Nishikawa T, Yoshizaki K. Down-regulation of hepcidin resulting from long-term treatment with an anti-IL-6 receptor antibody (tocilizumab) improves anemia of inflammation in multicentric Castleman disease. *Blood*. 2010;116(18):3627-34.
- S20. Burmester GR, Feist E, Kellner H, Braun J, Iking-Konert C, Rubbert-Roth A. Effectiveness and safety of the interleukin 6-receptor antagonist tocilizumab after 4 and 24 weeks in patients with active rheumatoid arthritis: the first phase IIIb real-life study (TAMARA). *Ann Rheum Dis*. 2010 Dec 27. [Epub ahead of print]
- S21. Genovese MC, McKay JD, Nasonov EL, Mysler EF, da Silva NA, Alecock E, Woodworth T, Gomez-Reino JJ. Interleukin-6 receptor inhibition with tocilizumab reduces disease activity in rheumatoid arthritis with inadequate response to disease-modifying antirheumatic drugs: the tocilizumab in combination with traditional disease-modifying antirheumatic drug therapy study. *Arthritis Rheum*. 2008;58(10):2968–80.
- S22. Yokota S, Imagawa T, Mori M, Miyamae T, Aihara Y, Takei S, Iwata N, Umebayashi H, Murata T, Miyoshi M, Tomiita M, Nishimoto N, Kishimoto T. Efficacy and safety of tocilizumab in patients with systemic-onset juvenile idiopathic arthritis: a randomised, double-blind, placebo-controlled, withdrawal phase III trial. *Lancet*. 2008;371(9617):998–1006.

## Search strategy used to identify reports of *IL6R* variant associations

Published studies were identified through electronic searches using Medline and by scanning reference lists of articles identified for all relevant studies (including review articles). The computer-based searches combined search terms related to the interleukin-6 receptor and relevant genetic variants without language restriction.

Pubmed strategy:

genetic[tw] OR genetic research[mh] OR genetics[tw] OR medical genetics[mh:noexp] OR genetics, population[mh] OR genomics[mh:noexp] OR genomic[tw] OR genomics[tw] OR molecular epidemiology[tw] OR molecular epidemiology[mh] OR molecular association[tw] OR genes[mh] OR genes[tw] OR gene[tw] OR allele[tw] OR alleles[tw] OR allelic[tw] OR polymorphism[tw] OR polymorphisms[tw] OR polymorphic[tw] OR SNP[tw] OR mutation[tw] OR mutations[tw] OR mutant[tw] OR mutants[tw] OR homozygote[tw] OR homozygotes[tw] OR homozygotic[tw] OR heterozygote[tw] OR heterozygotes[tw] OR heterozygotic[tw] OR genotype[mh] OR genotype[tw] OR genotypes[tw] OR genotypic[tw] OR genotyped[tw] OR phenotype[mh] OR phenotype[tw] OR phenotypes[tw] OR phenotypic[tw] OR phenotyped[tw] OR haplotype[tw] OR haplotypes[tw] OR haplotypic[tw] OR haplotyped[tw] OR genetic variant\*[tw] OR genetic variation[tw] OR variation genetics[mh] OR DNA[mh:noexp] OR DNA[tw] OR locus[tw] OR loci[tw] OR penetrance[tw]

AND

"interleukin 6 receptor"[tiab] OR receptor, interleukin-6[MeSH] OR IL6R[tiab] OR IL6-receptor[tiab] OR "IL-6 receptor"[tiab] OR rs4537545[tiab] OR rs8192284[tiab] OR rs4129267[tiab] or rs2228145[tiab]

## Investigators in the Cardiogenics Consortium

Tony Attwood<sup>1</sup>, Stephanie Belz<sup>2</sup>, Peter Braund<sup>3</sup>, Jessy Brocheton<sup>4</sup>, François Cambien<sup>4</sup>, Jason Cooper<sup>5</sup>, Abi Crisp-Hihn<sup>1</sup>, Patrick Diemert (formerly Linsel-Nitschke)<sup>2</sup>, Panos Deloukas<sup>6</sup>, Jeanette Eardman<sup>2</sup>, Nicola Foad<sup>1</sup>, Tiphaine Godefroy<sup>4</sup>, Alison H Goodall<sup>3,11</sup>, Jay Gracey<sup>3</sup>, Emma Gray<sup>6</sup>, Rhian Gwilliams<sup>6</sup>, Susanne Heimerl<sup>7</sup>, Christian Hengstenberg<sup>7</sup>, Jennifer Jolley<sup>1</sup>, Unni Krishnan<sup>3</sup>, Heather Lloyd-Jones<sup>1</sup>, Ulrika Liljedahl<sup>8</sup>, Ingrid Lugauer<sup>7</sup>, Per Lundmark<sup>8</sup>, Seraya Maouche<sup>2,4</sup>, Jasbir S Moore<sup>3</sup>, Gilles Montalescot<sup>4</sup>, David Muir<sup>1</sup>, Elizabeth Murray<sup>1</sup>, Chris P Nelson<sup>3</sup>, Jessica Neudert<sup>9</sup>, David Niblett<sup>6</sup>, Karen O'Leary<sup>1</sup>, Willem H Ouwehand<sup>1,6</sup>, Helen Pollard<sup>3</sup>, Carole Proust<sup>4</sup>, Angela Rankin<sup>1</sup>, Augusto Rendon<sup>12</sup>, Catherine M Rice<sup>6</sup>, Hendrik B Sager<sup>2</sup>, Nilesh J Samani<sup>3,11</sup>, Jennifer Sambrook<sup>1</sup>, Gerd Schmitz<sup>10</sup>, Michael Scholz<sup>9</sup>, Laura Schroeder<sup>2</sup>, Heribert Schunkert<sup>2</sup>, Jonathan Stephens<sup>1</sup>, Ann-Christine Syvannen<sup>8</sup>, Stefanie Tennstedt (formerly Gulde)<sup>2</sup>, Chris Wallace<sup>5</sup>.

<sup>1</sup> *Department of Haematology, University of Cambridge, Long Road, Cambridge, CB2 2PT, UK and National Health Service Blood and Transplant, Cambridge Centre, Long Road, Cambridge, CB2 2PT, UK;*

<sup>2</sup> *Medizinische Klinik 2, Universität zu Lübeck, Lübeck Germany*

<sup>3</sup> *Department of Cardiovascular Sciences, University of Leicester, Glenfield Hospital, Groby Road, Leicester, LE3 9QP, UK*

<sup>4</sup> *INSERM UMRS 937, Pierre and Marie Curie University (UPMC, Paris 6) and Medical School, 91 Bd de l'Hôpital 75013, Paris, France*

<sup>5</sup> *Juvenile Diabetes Research Foundation/Wellcome Trust Diabetes and Inflammation Laboratory, Department of Medical Genetics, Cambridge Institute for Medical Research, University of Cambridge, Wellcome Trust/MRC Building, Cambridge, CB2 0XY, UK*

<sup>6</sup> *The Wellcome Trust Sanger Institute, Wellcome Trust Genome Campus, Hinxton, Cambridge CB10 1SA, UK*

<sup>7</sup> *Klinik und Poliklinik für Innere Medizin II, Universität Regensburg, Germany*

<sup>8</sup> *Molecular Medicine, Department of Medical Sciences, Uppsala University, Uppsala, Sweden*

<sup>9</sup> *Trium, Analysis Online GmbH, Hohenlindenerstr. 1, 81677, München, Germany*

<sup>10</sup> *Institut für Klinische Chemie und Laboratoriumsmedizin, Universität, Regensburg, D-93053 Regensburg, Germany*

<sup>11</sup> *Leicester NIHR Biomedical Research Unit in Cardiovascular Disease, Glenfield Hospital, Leicester, LE3 9QP, UK*

<sup>12</sup> *European Bioinformatics Institute, Wellcome Trust Genome Campus, Hinxton, Cambridge, CB10 1SD, UK*
